# Supplementary material
Source: PubMed Central journal article supplement (PMC9454059)
Supplement: NIHMS1834048-supplement-SI1.pdf [file NIHMS1834048-supplement-SI1.pdf]

**Phenotype-guided comparative genomics identifies the complete transport pathway of the antimicrobial lasso peptide ubonodin in *Burkholderia***

**Supporting Information**

Truc Do<sup>1</sup>, Alina Thokkadam<sup>1</sup>, Robert Leach<sup>2</sup>, A. James Link<sup>1,3,4,\*</sup>

<sup>1</sup>Department of Chemical and Biological Engineering, Princeton University, Princeton, NJ 08544, United States

<sup>2</sup>Lewis-Sigler Institute for Integrative Genomics, Princeton University, Princeton, NJ 08544, United States

<sup>3</sup>Department of Chemistry, Princeton University, Princeton, NJ 08544, United States

<sup>4</sup>Department of Molecular Biology, Princeton University, Princeton, NJ 08544, United States

\*Corresponding author: [ajlink@princeton.edu](mailto:ajlink@princeton.edu)

## Table of Contents

|                                                                                                                                            |     |
|--------------------------------------------------------------------------------------------------------------------------------------------|-----|
| Additional materials and methods.....                                                                                                      | S3  |
| Figure S1. Spot-on-lawn assay assessing Bcc strains for ubonodin susceptibility.....                                                       | S11 |
| Figure S2. Conservation of the RNA polymerase $\beta$ and $\beta'$ subunits across the Bcc strains tested for ubonodin susceptibility..... | S12 |
| Figure S3. Iron supplementation mitigates the defect in <i>B. cepacia</i> cell growth due to <i>tonB1</i> depletion.....                   | S13 |
| Figure S4. A single TonB pathway is required for ubonodin activity.....                                                                    | S14 |
| Figure S5. Most TonB homologs are non-essential in <i>B. cepacia</i> .....                                                                 | S15 |
| Figure S6. PupB homologs encoded by ubonodin-susceptible strains harbor an N-terminal extension domain.....                                | S16 |
| Table S1. MICs of ubonodin against susceptible Bcc strains.....                                                                            | S17 |
| Table S2. Protein BLAST prediction of TonB-dependent transporters (TBDTs) encoded by <i>B. cepacia</i> .....                               | S18 |
| Table S3. Protein BLAST prediction of TonB homologs in <i>B. cepacia</i> .....                                                             | S19 |
| Table S4. MICs of ubonodin for <i>B. cepacia tonB</i> mutants.....                                                                         | S20 |
| Table S5. Iron-repressed genes in <i>B. cepacia</i> identified using RNA-seq.....                                                          | S21 |
| Table S6. Iron-induced genes in <i>B. cepacia</i> identified using RNA-seq.....                                                            | S24 |
| Table S7. Summary of RNA-seq data showing how excess iron affects the expression of genes encoding putative <i>B. cepacia</i> TBDTs.....   | S26 |
| Table S8. Experimentally-determined DNA-binding sites of the <i>P. aeruginosa</i> ferric uptake regulator (Fur) protein.....               | S27 |
| Table S9. Bacterial strains used in this study.....                                                                                        | S28 |
| Table S10. Plasmids used in this study.....                                                                                                | S29 |
| Table S11. Oligos used in this study.....                                                                                                  | S30 |
| References.....                                                                                                                            | S32 |

## ADDITIONAL MATERIALS AND METHODS

### Safety statement

No unexpected or unusually high safety hazards were encountered in the course of this study.

### Culture conditions

Unless otherwise indicated, all bacterial strains were cultured in Luria-Bertani Miller broth (10 g L<sup>-1</sup> tryptone, 10 g L<sup>-1</sup> NaCl, 5 g L<sup>-1</sup> yeast extract). For spot-on-lawn assays, LB and M63 media (2 g L<sup>-1</sup> (NH<sub>4</sub>)<sub>2</sub>SO<sub>4</sub>, 13.6 g L<sup>-1</sup> KH<sub>2</sub>PO<sub>4</sub>, 0.2% (w/v) D-glucose, 1 mM MgSO<sub>4</sub>, 0.04 g L<sup>-1</sup> each of the 20 standard amino acids, 0.00005% (w/v) thiamine) were used. For MIC liquid inhibition assays, cation-adjusted Mueller-Hinton II broth was also used (3 g L<sup>-1</sup> beef extract, 17.5 g L<sup>-1</sup> acid hydrolysate of casein, 1.5 g L<sup>-1</sup> starch, 10 mg L<sup>-1</sup> Mg<sup>2+</sup>, 20 mg L<sup>-1</sup> Ca<sup>2+</sup>). *E. coli* strains were grown at 37 °C overnight. *B. cepacia* strain ATCC 25416 was typically grown at 30 °C for 1–2 days until distinct colonies appeared. All Bcc clinical isolates were grown at 32–35 °C for 1–3 days until colonies appeared. Antibiotics were used at the following concentration for selection in *E. coli*: 100 µg mL<sup>-1</sup> ampicillin, 25 µg mL<sup>-1</sup> chloramphenicol, 50 µg mL<sup>-1</sup> trimethoprim, 50 µg mL<sup>-1</sup> kanamycin, and 50 µg mL<sup>-1</sup> gentamicin. For selection in *B. cepacia*, antibiotics were used at the following concentrations: 300 µg mL<sup>-1</sup> kanamycin, 50–100 µg mL<sup>-1</sup> trimethoprim, and 50 µg mL<sup>-1</sup> chloramphenicol.

### Strain construction

The list of strains used in this study can be found in **Table S9**. Chemical transformation was used to introduce plasmids into *E. coli* XL1-Blue Mix & Go competent cells (Zymo Research, cat. no. T3002) or *E. coli* DH5α chemically competent cells. Electroporation was used to introduce pir-dependent plasmids into electrocompetent *E. coli* CC118(λpir) and *E. coli* S17-1(λpir) cells. Electroporation was also used to introduce plasmids into electrocompetent *E. coli* BL21 and BL21(DE3) Δ*slyD* cells. Abbreviations used in this and the plasmid construction sections: Cm<sup>R</sup>, chloramphenicol resistance; Gent<sup>R</sup>, gentamicin resistance, Tp/TpTer/Tp<sup>R</sup>, trimethoprim resistance; Km/Km<sup>R</sup>, kanamycin resistance.

**TD042** [*B. cepacia* ATCC 25416 ΔGGFLHMPP\_06959 (*tonB3*::TpTer)]. The donor strain *E. coli* S17-1(λpir) propagating the pTD005-[pSHAFT3-Δ*tonB3*::TpTer] suicide plasmid was biparentally mated into recipient strain *B. cepacia* ATCC 25416. Tp<sup>R</sup>Gent<sup>R</sup> transconjugant colonies were screened to identify double-crossover mutants which are also Cm<sup>S</sup> and further confirmed by colony PCR using primer pairs oTD045-oTD046 and oTD045-oTD043.

**TD075** [*B. cepacia* ATCC 25416 ΔGGFLHMPP\_00610 (*fur*::Km; pSCrhaB2-*fur*)]. This strain was made in two steps by first introducing the *fur* expression plasmid and then replacing chromosomal *fur* with a Km<sup>R</sup> marker. The donor strain *E. coli* DH5α propagating pTD013-[pSCrhaB2-*fur*] and helper strain *E. coli* DH5α/pRK2013 were triparentally mated with recipient strain *B. cepacia* ATCC 25416 to transfer the expression plasmid. Tp<sup>R</sup>Gent<sup>R</sup> transconjugant colonies were checked by colony PCR using primer pairs oTD035-oTD036 to confirm transfer of pTD013. Next, the donor strain *E. coli* S17-1(λpir) propagating the pTD016-[pTD014-Δ*fur*::Km] suicide plasmid was biparentally mated into recipient strain *B. cepacia* ATCC 25416; pSCrhaB2-*fur*. Km<sup>R</sup>Gent<sup>R</sup> transconjugant colonies were screened to identify double-crossover mutants which are also Cm<sup>S</sup> and further confirmed by colony PCR using primer pairs oTD062-oTD063 and oTD063-oTD091. Strain TD075 needed to be propagated on LB selection plates supplemented with 0.02–0.2% (w/v) L-rhamnose as *fur* is essential.

**TD078** [*B. cepacia* ATCC 25416  $\Delta$ GGFLHMPP\_07362 (*tonB4*::Km)]. The donor strain *E. coli* S17-1( $\lambda$ pir) propagating the pTD017-[pSHAFT3- $\Delta$ *tonB4*::Km] suicide plasmid was biparentally mated into recipient strain *B. cepacia* ATCC 25416. Km<sup>R</sup>Gent<sup>R</sup> transconjugant colonies were screened to identify double-crossover mutants which are also Cm<sup>S</sup> and further confirmed by colony PCR using primer pairs oTD089-oTD090 and oTD090-oTD091.

**TD080** [*B. cepacia* ATCC 25416; pSCrhaB2]. The donor strain *E. coli* DH5 $\alpha$  propagating pSCrhaB2 and helper strain *E. coli* DH5 $\alpha$ /pRK2013 were triparentally mated with recipient strain *B. cepacia* ATCC 25416 to transfer the empty vector. Tp<sup>R</sup>Gent<sup>R</sup> transconjugant colonies were checked by colony PCR using primer pairs oTD035-oTD036 to confirm transfer of pSCrhaB2.

**TD090** [*B. cepacia* ATCC 25416  $\Delta$ GGFLHMPP\_04892 (*tonB2*::TpTer)]. The donor strain *E. coli* S17-1( $\lambda$ pir) propagating the pTD022-[pTD014- $\Delta$ *tonB2*::TpTer] suicide plasmid was biparentally mated into recipient strain *B. cepacia* ATCC 25416. Tp<sup>R</sup>Gent<sup>R</sup> transconjugant colonies were screened to identify double-crossover mutants which are also Cm<sup>S</sup> and further confirmed by colony PCR using primer pairs oTD132-oTD133 and oTD132-oTD043.

**TD091** [*B. cepacia* ATCC 25416  $\Delta$ GGFLHMPP\_02544 (*tonB1*::Km; pSCrhaB2-*tonB1*)]. This strain was made in two steps by first introducing the *tonB1* expression plasmid and then replacing chromosomal *tonB1* with a Km<sup>R</sup> marker. The donor strain *E. coli* DH5 $\alpha$  propagating pTD020-[pSCrhaB2-*tonB1*] and helper strain *E. coli* DH5 $\alpha$ /pRK2013 were triparentally mated with recipient strain *B. cepacia* ATCC 25416 to transfer the expression plasmid. Tp<sup>R</sup>Gent<sup>R</sup> transconjugant colonies were checked by colony PCR using primer pairs oTD035-oTD036 to confirm transfer of pTD020. Next, the donor strain *E. coli* S17-1( $\lambda$ pir) propagating the pTD019-[pTD014- $\Delta$ *tonB1*::Km] suicide plasmid was biparentally mated into recipient strain *B. cepacia* ATCC 25416; pSCrhaB2-*tonB1*. Km<sup>R</sup>Gent<sup>R</sup> transconjugant colonies were screened to identify double-crossover mutants which are also Cm<sup>S</sup> and further confirmed by colony PCR using primer pairs oTD118-oTD119 and oTD118-oTD091. Strain TD091 was propagated on LB selection plates supplemented with 0.02% (w/v) L-rhamnose as *tonB1* is important for healthy cell growth.

**TD103** [*B. cepacia* ATCC 25416  $\Delta$ GGFLHMPP\_01381 (*pupB*::Km)]. The donor strain *E. coli* S17-1( $\lambda$ pir) propagating the pTD023-[pTD014- $\Delta$ *pupB*::Km] suicide plasmid was biparentally mated into recipient strain *B. cepacia* ATCC 25416. Km<sup>R</sup>Gent<sup>R</sup> transconjugant colonies were screened to identify double-crossover mutants which are also Cm<sup>S</sup> and further confirmed by colony PCR using primer pairs oTD151-oTD152.

**TD118** [*B. cepacia* ATCC 25416  $\Delta$ GGFLHMPP\_01381 (*pupB*::Km; pSCrhaB2-APZ15\_10615 (*pupB*))]. This strain was made in two steps by first introducing the *pupB* expression plasmid and then replacing chromosomal *pupB* with a Km<sup>R</sup> marker. The donor strain *E. coli* DH5 $\alpha$  propagating pTD029-[pSCrhaB2-*pupB*] and helper strain *E. coli* DH5 $\alpha$ /pRK2013 were triparentally mated with recipient strain *B. cepacia* ATCC 25416 to transfer the expression plasmid. Tp<sup>R</sup>Gent<sup>R</sup> transconjugant colonies were checked by colony PCR using primer pairs oTD035-oTD036 to confirm transfer of pTD029. Next, the donor strain *E. coli* S17-1( $\lambda$ pir) propagating the pTD023-[pTD014- $\Delta$ *pupB*::Km] suicide plasmid was biparentally mated into recipient strain *B. cepacia* ATCC 25416; pSCrhaB2-*pupB*. Km<sup>R</sup>Gent<sup>R</sup> transconjugant colonies were screened to identify double-crossover mutants which are also Cm<sup>S</sup> and further confirmed by colony PCR using primer pairs oTD151-oTD152.

**TD122** [*B. cepacia* ATCC 25416  $\Delta$ GGFLHMPP\_00373 (*yddA*::TpTer)]. The donor strain *E. coli* S17-1( $\lambda$ pir) propagating the pTD032-[pTD014- $\Delta$ *yddA*::TpTer] suicide plasmid was biparentally

mated into recipient strain *B. cepacia* ATCC 25416. Tp<sup>R</sup>Gent<sup>R</sup> transconjugant colonies were screened to identify double-crossover mutants which are also Cm<sup>S</sup> and further confirmed by colony PCR using primer pairs oTD180-oTD179 and oTD180-oTD043.

## Plasmid construction

The list of plasmids and oligonucleotides used in this study can be found in **Tables S10** and **S11**, respectively. Plasmids were cloned using *E. coli* XL1-Blue and *E. coli* DH5 $\alpha$  for general purposes, but pir-dependent pSHAFT3-based plasmids were cloned using *E. coli* CC118( $\lambda$ pir). The pWC99 plasmid for ubonodin purification was overexpressed in *E. coli* BL21. Plasmids for *B. cepacia* PupB and/or TonB1 overexpression were freshly transformed into *E. coli* BL21(DE3)  $\Delta$ slyD. When needed, bacterial genomic DNA was extracted using the DNeasy Blood & Tissue Kit (QIAGEN, cat. no. 69504) according to manufacturer's protocol. The Q5<sup>®</sup> High-Fidelity DNA Polymerase and buffers (NEB, cat. no. M0491L) were used for PCR. Other standard cloning reagents include T4 DNA ligase (NEB), restriction enzymes (NEB), Zymoclean Gel DNA Recovery Kits (Zymo Research), and QIAprep Spin Miniprep Kits (QIAGEN). All plasmids were sequenced using the GENEWIZ/Azenta Life Sciences sequencing service to confirm the correct insert was cloned.

**pTD005** [pSHAFT3- $\Delta$ GGFLHMPP\_06959 (*tonB3*)::TpTer]. The 692-bp sequence upstream of the *tonB3* ATG start codon was PCR-amplified using primer pairs oTD026-oTD027 and ATCC 25416 gDNA template. The PcS-TpTer cassette was PCR-amplified using primer pairs oTD029-oTD030 and p34E-TpTer plasmid template. The 783-bp sequence downstream of *tonB3* Ser227 codon was PCR-amplified using primer pairs oTD028-oTD025 and ATCC 25416 gDNA template. The 3 PCR products were stitched together with T4 DNA ligase and cloned between the EcoRI and XbaI sites of pSHAFT3.

**pTD013** [pSCRhaB2-GGFLHMPP\_00610 (*fur*)]. GGFLHMPP\_00610 [Met1–His142] was PCR-amplified using primer pairs oTD083-oTD084 and ATCC 25416 gDNA template. The PCR product was cloned between the NdeI and BamHI sites of pSCRhaB2.

**pTD014** [pSHAFT3-Amp<sup>R</sup> Cyt717Ade-BsaI-PGphD-mCherry-BsaI]. This plasmid was made in two steps. First, the Amp<sup>R</sup> [Ile140–Gly242] sequence was PCR-amplified using primer pairs oTD064-oTD065 and pSHAFT3 plasmid template. Primer oTD064 mutates out the native BsaI within the pSHAFT3 Amp<sup>R</sup> sequence. The PCR product was cloned between the BsaI and PvuII sites of pSHAFT3. Next, the PGphD promoter was PCR-amplified using primer pairs oTD076-oTD078 and pYTK001 plasmid template, a plasmid made available on Addgene (#65108) from John Dueber<sup>1</sup>. The mCherry sequence was PCR-amplified using primer pairs oTD079-oTD080 and pET28a-mCherry-CNA35 plasmid template, a plasmid made available on Addgene (#61607) from Maarten Merckx<sup>2</sup>. Overlap PCR was performed to stitch together the PGphD and mCherry products, and the resultant product was cloned between the EcoRI and XbaI sites of the plasmid generated in the first step.

**pTD016** [pTD014- $\Delta$ GGFLHMPP\_00610 (*fur*)::Km]. The 702-bp sequence upstream of the *fur* Thr5 codon was PCR-amplified using primer pairs oTD094-oTD095 and ATCC 25416 gDNA template. The PcS-Km cassette was PCR-amplified using primer pairs oTD098-oTD099 and p34E-Km plasmid template. The 671-bp sequence downstream of the *fur* Arg140 codon was PCR-amplified using primer pairs oTD096-oTD097 and ATCC 25416 gDNA template. The 3 PCR products were cloned between the EcoRI and XbaI sites of pTD014 via Golden Gate cloning.

**pTD017** [pSHAFT3- $\Delta$ GGFLHMPP\_07362 (*tonB4*)::Km]. The 742-bp sequence upstream of the *tonB4* Met1 start codon was PCR-amplified using primer pairs oTD071-oTD104 and ATCC 25416

gDNA template. The PcS-Km cassette was PCR-amplified using primer pairs oTD106-oTD107 and p34E-Km plasmid template. The 716-bp sequence downstream of the *tonB4* Phe223 codon was PCR-amplified using primer pairs oTD105-oTD068 and ATCC 25416 gDNA template. The 3 PCR products were stitched together using overlap PCR and cloned between the EcoRI and XbaI sites of pSHAFT3.

**pTD019** [pTD014-ΔGGFLHMPP\_02544 (*tonB1*::Km)]. The 615-bp sequence upstream of the *tonB1* Pro3 codon was PCR-amplified using primer pairs oTD114-oTD115 and ATCC 25416 gDNA template. The PcS-Km cassette was PCR-amplified using primer pairs oTD098-oTD099 and p34E-Km plasmid template. The 588-bp sequence downstream of the *tonB1* stop codon was PCR-amplified using primer pairs oTD116-oTD117 and ATCC 25416 gDNA template. The 3 PCR products were cloned between the EcoRI and XbaI sites of pTD014 via Golden Gate cloning.

**pTD020** [pSCRhaB2-GGFLHMPP\_02544 (*tonB1*)]. GGFLHMPP\_02544 [Met1–Asp226] was PCR-amplified using primer pairs oTD120-oTD121 and ATCC 25416 gDNA template. The PCR product was cloned between the NdeI and BamHI sites of pSCRhaB2.

**pTD022** [pTD014-ΔGGFLHMPP\_04892 (*tonB2*::TpTer)]. The 670-bp sequence upstream of the *tonB2* Met1 codon was PCR-amplified using primer pairs oTD128-oTD129 and ATCC 25416 gDNA template. The PcS-TpTer cassette was PCR-amplified using primer pairs oTD029-oTD030 and p34E-TpTer plasmid template. The 625-bp sequence downstream of the *tonB2* Asp269 codon was PCR-amplified using primer pairs oTD130-oTD131 and ATCC 25416 gDNA template. The 3 PCR products were cloned between the EcoRI and XbaI sites of pTD014 via Golden Gate cloning.

**pTD023** [pTD014-ΔGGFLHMPP\_01381 (*pupB*::Km)]. The 686-bp sequence upstream of the *pupB* Val2 codon was PCR-amplified using primer pairs oTD134-oTD135 and ATCC 25416 gDNA template. The PcS-Km cassette was PCR-amplified using primer pairs oTD098-oTD099 and p34E-Km plasmid template. The 724-bp sequence downstream of the *pupB* Leu840 codon was PCR-amplified using primer pairs oTD136-oTD137 and ATCC 25416 gDNA template. The 3 PCR products were cloned between the EcoRI and XbaI sites of pTD014 via Golden Gate cloning.

**pTD027** [pRSFDuet-1-GGFLHMPP\_02544 (*tonB1*)]. GGFLHMPP\_02544 [Met1–Asp226] was PCR-amplified using primer pairs oTD168-oTD169 and ATCC 25416 gDNA template. The PCR product was cloned between the NcoI and HindIII sites of pRSFDuet-1.

**pTD029** [pSCRhaB2-APZ15\_10615 (*pupB*)]. APZ15\_10615 [Met1–Phe858] was PCR-amplified using primer pairs oTD173-oTD174 and ATCC 25416 gDNA template. The PCR product was cloned between the NdeI and HindIII sites of pSCRhaB2.

**pTD030** [pRSFDuet-1-GGFLHMPP\_02544 (*tonB1*)-APZ15\_10615 (*pupB*)]. APZ15\_10615 [Met1–Phe858] was PCR-amplified using primer pairs oTD173-oTD170 and ATCC 25416 gDNA template. The PCR product was cloned between the NdeI and AvrII sites of pTD027.

**pTD031** [pRSFDuet-1-APZ15\_10615 (*pupB*)]. APZ15\_10615 [Met1–Phe858] was PCR-amplified using primer pairs oTD173-oTD170 and ATCC 25416 gDNA template. The PCR product was cloned between the NdeI and AvrII sites of pRSFDuet-1.

**pTD032** [pTD014-ΔGGFLHMPP\_00373 (*yddA*::TpTer)]. The 634-bp sequence upstream of the *yddA* Met1 codon was PCR-amplified using primer pairs oTD175-oTD176 and ATCC 25416 gDNA template. The PcS-TpTer cassette was PCR-amplified using primer pairs oTD029-oTD030

and p34E-TpTer plasmid template. The 605-bp sequence downstream of the *yddA* Val581 codon was PCR-amplified using primer pairs oTD177-oTD178 and ATCC 25416 gDNA template. The 3 PCR products were cloned between the EcoRI and XbaI sites of pTD014 via Golden Gate cloning.

### **Biparental mating**

Biparental mating was used to transfer pSHAFT3-based suicide plasmids<sup>3</sup> from *E. coli* into *B. cepacia* for allelic replacement. Briefly, 50 µL each of overnight cultures of the donor strain propagating the suicide plasmid and the recipient strain were mixed. The cell mixture was centrifuged at 6000 xg for 2 min at room temperature, and the cell pellet was resuspended with 50 µL of LB and spotted onto an LB agar plate without antibiotic selection. The plate was incubated face up at 30 °C overnight. The next day, the mating spot was scraped up with an inoculation loop and resuspended in 200 µL of sterile 1X PBS buffer. The resuspended cell mixture was plated on the appropriate selection plates to select for transconjugants. Gentamicin was used to select against the donor strain. Transconjugant colonies were picked and patched to screen for Cm<sup>S</sup> indicating double-crossover mutants that have lost the wild-type allele.

### **Triparental mating**

Triparental mating was used to transfer pSCrhaB2-based plasmids from *E. coli* into *B. cepacia*. Our study adapted a previously published protocol for triparental mating<sup>4</sup>. Briefly, 50 µL each of overnight cultures of the donor strain propagating the cargo plasmid, the helper strain *E. coli* DH5α/pRK2013<sup>5</sup>, and the recipient strain were mixed. The cell mixture was centrifuged at 6000 xg for 2 min at room temperature, and the cell pellet was resuspended with 50 µL of LB and spotted onto an LB agar plate without antibiotic selection. The plate was incubated face up at 30 °C overnight. The next day, the mating spot was scraped up with an inoculation loop and resuspended in 200 µL of sterile 1X PBS buffer. The resuspended cell mixture was plated on the appropriate selection plates to select for transconjugants. Gentamicin was used to select against the donor strain.

### **Expression and purification of ubonodin**

Ubonodin was overexpressed and purified as previously reported<sup>6</sup>. Briefly, BL21 propagating pWC99 was grown in M9 media (6.4 mg L<sup>-1</sup> Na<sub>2</sub>HPO<sub>4</sub> • 7 H<sub>2</sub>O, 1.5 mg L<sup>-1</sup> KH<sub>2</sub>PO<sub>4</sub>, 0.5 mg L<sup>-1</sup> NH<sub>4</sub>Cl, 0.25 mg L<sup>-1</sup> NaCl, 0.15 µg mL<sup>-1</sup> CaCl<sub>2</sub>, 1 mM MgSO<sub>4</sub>, 0.2% (w/v) D-glucose, 0.04 g L<sup>-1</sup> each of the 20 standard amino acids, 0.00005% (w/v) thiamine) and ubonodin expression was induced by the addition of 1 mM IPTG. Cultures were grown for ~20 h at 20 °C following induction and then centrifuged to harvest the supernatant. The supernatant was extracted through a Strata C8 column, eluted with 100% methanol, and dried by rotovapping. The dried extract was resuspended with 25% acetonitrile/75% water and further purified by semi-preparative reverse-phase HPLC using an Agilent Technologies 1200 series instrument fitted with a Zorbax 300SB-C18 column (9.4 mm x 250 mm, 5 µm). Purified ubonodin was lyophilized and resuspended in water. The purity was checked by LC-MS and the concentration was measured using the A280 Nanodrop ND-1000 Spectrophotometer reading.

### **Cladogram construction**

To construct the cladogram of Bcc strains tested for ubonodin susceptibility, first the allelic profile for 7 Bcc housekeeping genes (*atpD*, *gltB*, *gyrB*, *recA*, *lepA*, *phaC*, and *trpB*) and sequence type of each strain were retrieved from the *Burkholderia* Genome Database<sup>7</sup>. Then, the allelic profile and sequence type were entered into the PubMLST website (Public databases for molecular

typing and microbial genome diversity) to obtain the concatenated sequences of fragments of the 7 genes listed above. Finally, the concatenated sequences for all Bcc strains were aligned using Clustal Omega to generate a cladogram<sup>8</sup>.

### **RNA polymerase protein sequence alignment**

To generate a percent sequence identity matrix comparing the RNA polymerase  $\beta$  and  $\beta'$  subunits encoded by the Bcc strains tested for ubonodin susceptibility, first the RpoB and RpoC sequences for each strain were retrieved from NCBI. The concatenated RpoBC sequences were then aligned using Clustal Omega<sup>8</sup>.

### **Spot dilution assay**

To assess cell viability by spot dilution assay, overnight cultures of test strains were diluted 1:100 into fresh LB with antibiotics as needed the following morning and grown at 30 °C with shaking to an OD<sub>600</sub> of ~0.4–0.6. Once the cultures reached mid-exponential phase, all cultures for the set of strains being tested were normalized to the OD<sub>600</sub> of the least dense culture using LB. From this 10<sup>0</sup> starting dilution, ten-fold serial dilutions were prepared using LB. Five  $\mu$ L of each dilution was spotted onto the test media. The spots were left to dry in the biosafety cabinet with the lid slightly ajar. The plates were incubated ~15 h at the appropriate temperature and imaged the next day using the Bio Rad ChemiDoc XRS Gel Imaging System under epi white illumination and the Quantity One 4.6.6 imaging software. Images were processed using FIJI. Spot dilution assays were performed with at least 2 biological replicates (independent cultures) for each tested strain.

### **Liquid inhibition assay and bacterial growth rate analysis**

To assess the endpoint MIC of ubonodin by liquid inhibition assay, overnight cultures of test strains were diluted 1:100 into fresh LB with antibiotics as needed and grown at 30 °C with shaking to an OD<sub>600</sub> of ~0.4–0.6. Once the cultures reached mid-exponential phase, they were diluted to an OD<sub>600</sub> of 0.001 in the test media. Two-fold serial dilutions of ubonodin (0–32  $\mu$ M) were prepared in test media and 50  $\mu$ L of each dilution was dispensed into an untreated, sterile 96-well plate. The ubonodin dilutions were topped off with an equivalent volume (50  $\mu$ L) of the 0.001 OD<sub>600</sub> cells, bringing the final OD<sub>600</sub> to 0.0005 in each well and the range of ubonodin concentrations to 0–16  $\mu$ M. The 96-well plate was covered with a matching lid and incubated with shaking at 30 °C for ~16 h. The endpoint OD<sub>600</sub> was measured using a BioTek Synergy 4 plate reader and blanked to a test media only control to calculate the MIC of ubonodin. When needed, the test medium was supplemented with L-rhamnose to induce protein expression. Both cation-adjusted Mueller-Hinton Broth II and LB were used as test media for liquid inhibition assays; the media used in a certain assay is indicated within the corresponding figure caption.

To assess bacterial growth over time, exponential-phase LB cultures of test strains inoculated from a scoop of freshly-streaked colonies were diluted to a final OD<sub>600</sub> of 0.001 in 150  $\mu$ L of test media in a 96-well plate. The plate was covered with a matching lid and incubated with shaking at 30 °C in a BioTek Synergy 4 plate reader. OD<sub>600</sub> measurements were recorded at 20-min intervals for 20–24 h.

### **Ubonodin cellular uptake assay**

The endpoint concentration of ubonodin in the cell pellet was analyzed as a measure of cellular uptake. Overnight cultures of test strains were diluted 1:100 into fresh LB and grown at 30 °C with shaking to an OD<sub>600</sub> of ~0.4–0.6. The cultures were diluted to an OD<sub>600</sub> of 0.01 in M63 broth and



3 x 150  $\mu$ L aliquots were dispensed into separate wells of an untreated, sterile 96-well plate. One well was left untreated, the second well contained 1  $\mu$ M ubonodin, and the third well contained 2  $\mu$ M ubonodin. The plate was covered with a matching lid and incubated with shaking at 30 °C for ~16 h. The endpoint OD<sub>600</sub> was measured using a BioTek Synergy 4 plate reader and blanked to an M63 media only control. The content of each well was transferred to a 1.5-mL microcentrifuge tube and the cell pellet was harvested at 6000 xg for 2 min at room temperature. The supernatant was removed and the cell pellet was washed once with 200  $\mu$ L of sterile 1X PBS before a second spin to remove the wash fraction.

We adapted a previously published bacterial cell lysis protocol to release intracellular metabolites for LC-MS analysis<sup>9</sup>. The cell pellet was resuspended in 200  $\mu$ L of cold 100% methanol. The cell resuspension was transferred to dry ice for 5 min, followed by thawing at room temperature and vortexing for 30 sec. This freeze-thaw-vortex step was repeated 3 times in total and the lysate was spun down at 10000 xg for 5 min at room temperature to harvest the supernatant and pellet out the cell debris. A second extraction step was performed to maximize cell lysis. The cell debris pellet was resuspended with another 200  $\mu$ L of cold 100% methanol and subjected to another round of freeze-thaw-vortex before centrifugation. The supernatant from this second extraction was combined with the first extraction. To evaporate off the methanol of all samples in parallel, the methanol extracts were left in the fume hood at room temperature for ~24 h with the cap open.

The dried extracts were resuspended with 75  $\mu$ L of sterile ultrapure water and centrifuged at 10000 xg for 15 min at room temperature to pellet out debris. Thirty-five  $\mu$ L of the supernatant was transferred to an LC-MS vial fitted with a sample insert and 25  $\mu$ L was injected onto the LC-MS for analysis. LC-MS analysis was performed using a Zorbax 300SB-C18 column (2.1 mm x 50 mm, 3.5  $\mu$ m) installed on an Agilent 1260 Infinity II system in line with an Agilent 6530 Q-TOF mass spectrometer. The LC-MS gradient used for separation was: 0.5 mL min<sup>-1</sup> 90% solvent A (H<sub>2</sub>O, 0.1% formic acid) and 10% solvent B (acetonitrile, 0.1% formic acid) for 1 min followed by a linear gradient to 50% solvent B over 19 min, then a linear gradient to 90% solvent B over 5 min, and a linear gradient back to 10% solvent B over 5 min. As ubonodin undergoes oxidation<sup>6</sup> especially upon air drying in the fume hood, multiply-oxidized ubonodin species were observed by LC-MS. To calculate the intracellular concentration of ubonodin for each sample, the sum of the extracted ion counts of non-oxidized ubonodin and the ubonodin +16/32/48/64 species was calculated for the total sample volume of 75  $\mu$ L and normalized to the final OD<sub>600</sub>.

### Computational prediction of Fur DNA-binding sites

To predict Fur DNA-binding sites in the *B. cepacia* ATCC 25416 genome, the custom Python script PWMmodel.py was implemented on the Princeton Della server. This analysis was adapted from bioinformatics methods used for identification of regulatory elements<sup>10</sup>. It first required a set of known Fur DNA-binding site sequences, which are in general well-conserved. Seven experimentally-determined 19-bp Fur binding sequences from *P. aeruginosa* were used as the known set<sup>11-14</sup>. Alignment of these 7 sequences using the online MEME tool<sup>15</sup> generated a sequence logo summarizing the Fur consensus sequence. From these 7 sequences, a position frequency matrix (PFM) was also generated by calculating the number of times each nucleotide (A, C, G, T) was found at each position within the 19-bp sequence. The PFM captures the nucleotide characteristics at each position. The PFM was then converted to a position weight matrix (PWM) by calculating the probability of observing a particular nucleotide at a specific position normalized to the expected background probability. The *B. cepacia* ATCC 25416 genome is ~67% GC-rich, so 16.5% was expected for A/T each and 33.5% was expected for G/C each as the background probabilities. Using the PWM, any 19-bp sequence can be scored for how similar it is to the expected Fur binding site sequence. This is done by summing the individual PWM

scores corresponding to an observed nucleotide at each consecutive position. The PWM built from the 7 known Fur binding sites was used to scan the ATCC 25416 genome for high-scoring Fur boxes. The scan made use of a 19-bp sliding window, which shifted by 1 nucleotide in each iteration, on both the forward and reverse strands. As many genome fragments are analyzed and most produce low match scores, this study filtered for Fur box hits that are found proximal to, but not within, and facing the same direction as a coding DNA sequence (CDS). It also filtered for Fur box hits in terms of information content, a measure of conservation at each position. To generate histograms of the match scores for all or a subset of scanned fragments, the custom Python script PWM-annotator.py was implemented on the Della server. All custom scripts used in this analysis can be found on the Link lab Github page.

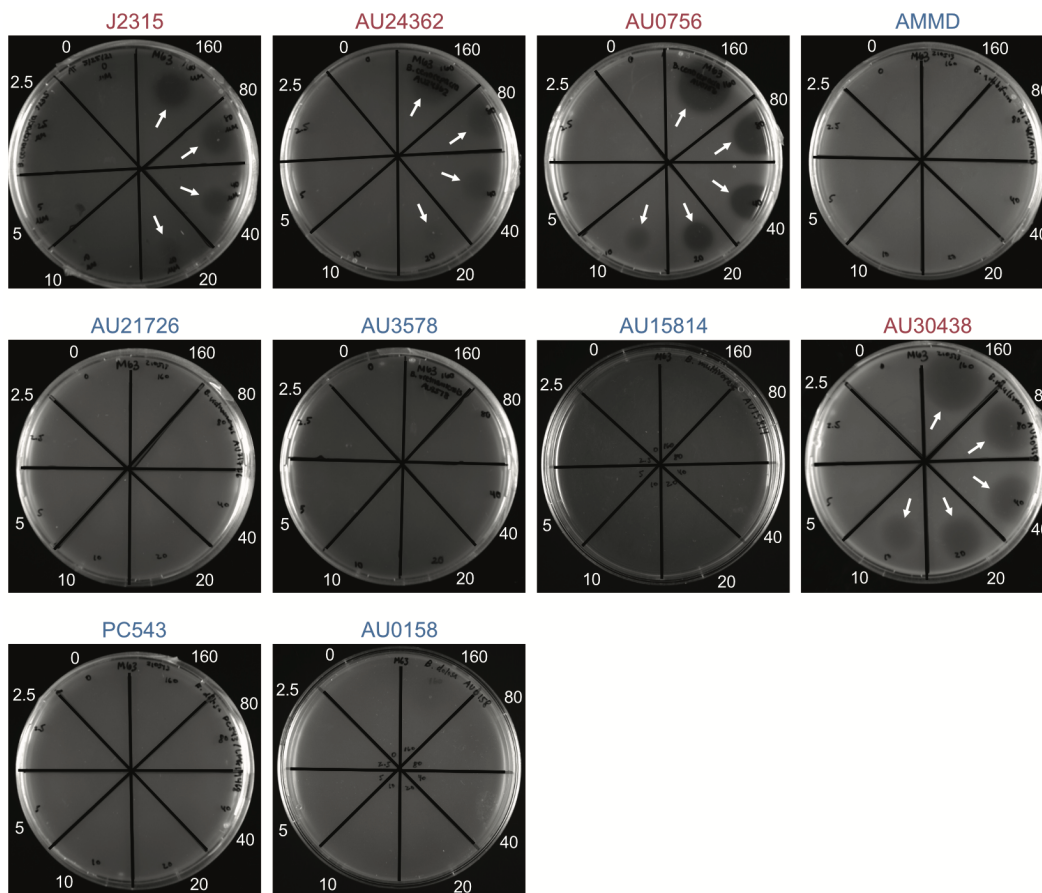

**Figure S1.** Spot-on-lawn assay assessing Bcc strains for ubonodin susceptibility. Cultures were grown to exponential phase, mixed with M63 soft agar, and plated on M63 base agar. Two-fold serial dilutions of ubonodin ranging from 0–160  $\mu\text{M}$  were spotted onto the respective sectors. For select strains, clear zones (arrows) indicating bacterial growth inhibition were observed. Ubonodin-susceptible strains are denoted in red and non-susceptible strains in blue. We note that *B. multivorans* AU15814 grew poorly on M63 compared to the other Bcc strains, which formed a lawn of cells.

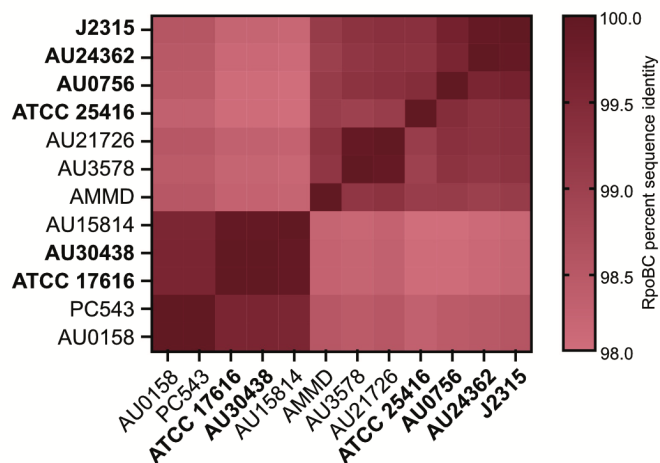

**Figure S2.** Conservation of the RNA polymerase  $\beta$  and  $\beta'$  subunits across the Bcc strains tested for ubonodin susceptibility. Heat map showing percent sequence identity when the concatenated amino acid sequences of RpoB ( $\beta$  subunit) and RpoC ( $\beta'$  subunit) were aligned with Clustal Omega. A darker shade represents more identical RpoBC sequences for a pair of strains along the x- and y-axes. Ubonodin-susceptible Bcc strains are bolded.

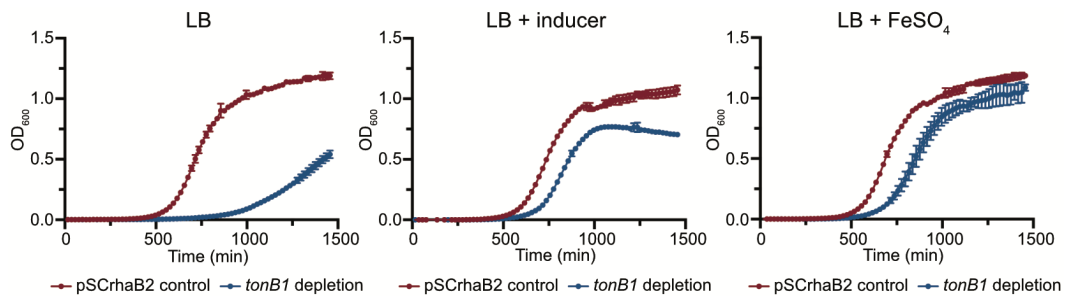

**Figure S3.** Iron supplementation mitigates the defect in *B. cepacia* cell growth due to *tonB1* depletion. The *tonB1* depletion mutant and empty vector control strain were grown in LB (left graph) and in the presence of 0.02% L-rhamnose (middle graph) or 200  $\mu$ M FeSO<sub>4</sub> (right graph). The mean  $\pm$  standard deviation for technical triplicates from the same overnight culture is shown.

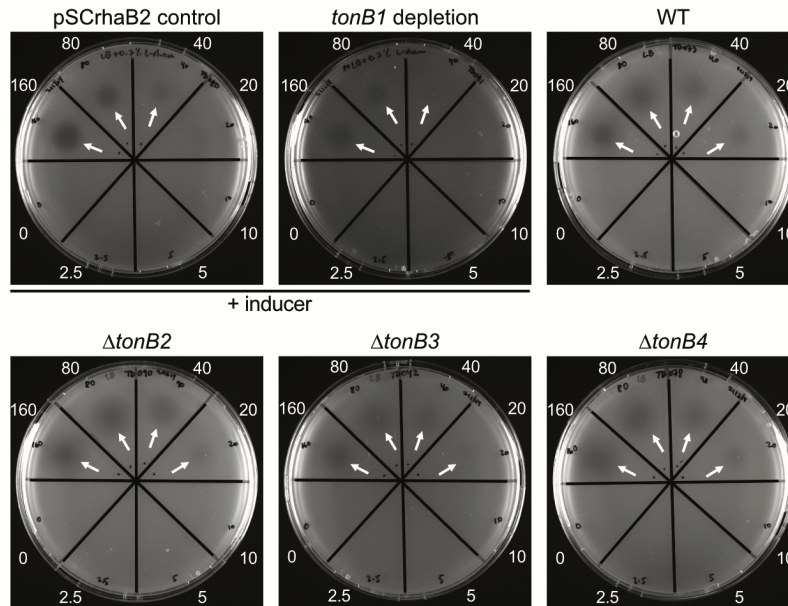

**Figure S4.** A single TonB pathway is required for ubonodin activity. Spot-on-lawn LB plates with the *tonB1* depletion and empty vector control strains, *B. cepacia* WT, and deletion mutants of the other 3 *tonB* homologs were examined for susceptibility to 0–160 μM of ubonodin. Ubonodin inhibition was observed (arrows) when *tonB1* was expressed (+ 0.2% L-rhamnose) and loss of the other TonBs did not impact the MIC.

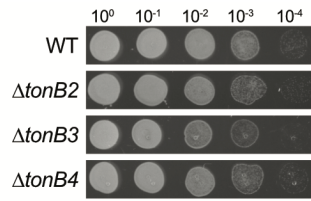

**Figure S5.** Most TonB homologs are non-essential in *B. cepacia*. Ten-fold serial dilutions of cultures were spotted onto LB agar.

```

AU3578_C6T65_RS03930 ----- 0
AU21726_WK26_RS15960 ----- 0
AMMD_HWV83_RS30065 ----- 0
AU0158_AK34_RS01065 ----- 0
PC543_BDSB_RS21645 ----- 0
AU30438_C6T56_RS20570 MGNESRTGPSFTDFSIMVSIRLMPPRRRPPASARHTRRTIV---PAVPNRVVAHRLAGAVLLS 57
ATCC_17616_GKFDAIBC_01990 MGNESRTGPSFTDFSIMVSIRLMPPRRRPPASARHTRRTIV---PAAPNRVAHRLAGAVLLS 57
AU15814_C6F96_RS05430 -----MVSIRLMPPRRRPPASARHTRRTIV---PAAPNRVAHRLAGAVLLS 41
ATCC_25416_GGFLHMPP_01381 -----MVSIRLTYRRRPPAPDRHLPRAPRPAAPAPGHLLARRLAGAVLVS 44
AU0756_C6P63_RS32125 MGSESSTGPSSTDSPIMASIRLTYRRRPPAPARHLPRASC---PAAPGRFARRLAGAVLLS 57
AU24362_C6T64_RS06375 MGHESSTGPSSTDSPIMASIRLTYRRRPPAPARHLPRASR---PAAPGLRARRLAGAVLLS 57
J2315_WL90_RS07105 MGHESSTGPSSTDSPIMASIRLTYRRRPPAPARHLPRASR---PAAPGLRARRLAGAVLLS 57

AU3578_C6T65_RS03930 -----MSFRRPLRRARALRPWRAGL----- 20
AU21726_WK26_RS15960 -----MSFRRPLRRARALRPWRAGL----- 20
AMMD_HWV83_RS30065 -----MFSRRTPRRARTLRFWRASL----- 20
AU0158_AK34_RS01065 -----MRSRRTPCRARTLRFWRASL----- 20
PC543_BDSB_RS21645 -----MRSRRTPCRARTLRFWRASL----- 20
AU30438_C6T56_RS20570 ALLPLPALADADTDAAAAAPRTSRRAFDVPAGPLEATLNRFRGRDAGLLIAFPPELTAGLT 117
ATCC_17616_GKFDAIBC_01990 ALLPLPALADADTDAAAAAPRTSRRAFDVPAGPLEATLNRFRGRDAGLLIAFPPELTAGLS 117
AU15814_C6F96_RS05430 ALLPLPALADADTDAAPAAQRAARRAFDIPAGPLEAALNRFRGRDAGILLAFPAELTAGLS 101
ATCC_25416_GGFLHMPP_01381 ALLPLPALADTDTDAAPAAQRAARRAFDIPAGPLEAALNRFRGRDAGILLAFPAELTAGLT 104
AU0756_C6P63_RS32125 ALLPLPALADTDTDAASRATORASRRAFDIPAGPLEATLNRFRGRDAGILLAFPELTAGLA 117
AU24362_C6T64_RS06375 ALLPLPALADTDVDAAPAAQASRRAFDIPAGPLEAALNRFRGRDAGILLAFPAELTAGLT 117
J2315_WL90_RS07105 ALLPLPALADTDADAAPAAQASRRAFDIPAGPLEAVLNRFRGRDAGILLAFPELTAGLT 117
.*.*.*.*

AU3578_C6T65_RS03930 -----PALITLTCVAGGAHAQAQRAAPASAAS-----AAE 49
AU21726_WK26_RS15960 -----PALITLTCVAGGAHAQAQRAAPASAASAADAASPAAPPAAE 60
AMMD_HWV83_RS30065 -----PALITLTCVASGAHAD-AEPAQ-----AASAPAPASVSPPE 54
AU0158_AK34_RS01065 -----PALITLTCVASGAHAADDERAQ-----HAARPAPASAPPAA 55
PC543_BDSB_RS21645 -----PALITLTCVASGAHAADDERAQ-----HAARPAPASAPPAA 55
AU30438_C6T56_RS20570 SGGVHGRFDVDDALARVLAGTGLVALRQPGGGYTLMRANGANGANGMSGAAVPAPASADTA 177
ATCC_17616_GKFDAIBC_01990 SGGVHGRFDVDDALARVLAGTGLVALRQSGGGYTLMRANGANGANGMSGAAVPAPASADTA 177
AU15814_C6F96_RS05430 SGGVHGRFDVDDALAHVLAGTGLVALRQPGGGYTLMRANGATVP-----AASAAS'TDST 155
ATCC_25416_GGFLHMPP_01381 SGCVOGRFDVDGALDRLLAGTGLVALRQPGGGYTLKRADGTVARPVA-----AGVAAG 157
AU0756_C6P63_RS32125 SGGVHGRFDVDGAFDRLLTGTGLVALRQPGGGYTLMRADGSAAGPVA-----AGVAPA 170
AU24362_C6T64_RS06375 SGGVHGRFDVDGAFDRLLAGTGLVALRQPGGGYTLMRADGSAAGPVA-----AGAAPA 170
J2315_WL90_RS07105 SGGVHGRFDVDGAFDRLLAGTGLVALRQPGGGYTLMRADGSAAGPVA-----AGAAPA 170
.*.*.*.*

AU3578_C6T65_RS03930 RELPAISVSASAVADPTVGYQPRSTSSIAGGDDRALKDIPOS IAVVSSAVMEDQHANSRDD 109
AU21726_WK26_RS15960 RELPAISVSASAVADPTVGYQPRSTSSIAGGDDRALKDIPOS IAVVSSAVMEDQHANSRDD 120
AMMD_HWV83_RS30065 RELPTISVNASAVADPTVGYQPRSTSSIAGGDARPIKEIPOS VAVVSSVMQDQARSRDD 114
AU0158_AK34_RS01065 HELAPISVSAALADPTVGYQPRSTSSIAGGDARPLKDIPOS VAVVSSAVM'DDQARSRDD 115
PC543_BDSB_RS21645 HELAPISVSAALADPTVGYQPRSTSSIAGGDARPLKDIPOS VAVVSSAVM'DDQARSRDD 115
AU30438_C6T56_RS20570 AELPTIAVRSSALLAQ--SYRPPKEAGVLRSDIPLVLDTAQAVNVVPAQVLRDQRPRLNDD 235
ATCC_17616_GKFDAIBC_01990 AELPTIAVRSSALLAQ--SYRPPKEAGVLRSDIPLVLDTAQAVNVVPAQVLRDQRPRLNDD 235
AU15814_C6F96_RS05430 AELPTIAVRSSALRAE--SYRPPKEAGVLRADTPVLDTAQAVNVVPAQVLRDQRPRLNDD 213
ATCC_25416_GGFLHMPP_01381 AELPAITVRSALRAE--SYRAPKEAGVLRSDIPLLDTAQAVNIVPAQVLRDQRPRLNDD 215
AU0756_C6P63_RS32125 TELPTIDVRSALRAE--SYRAPKEAGVLRSDIPLLDTAQAVNIVPAQVLRDQRPRLNDD 228
AU24362_C6T64_RS06375 AELPTINVRSSALRAE--SYRAPKEAGVLRSDIPLLDTAQAVNIVPAQVLRDQRPRLNDD 228
J2315_WL90_RS07105 AELPTINVRSSALRAE--NYRAPKEAGVLRSDIPLLDTAQAVNIVPAQVLRDQRPRLNDD 228
**.*.*.*.*:.*.*.*.*:.*.*.*.*:.*.*.*.*:.*.*.*.*:.*.*.*.*:.*.*.*.*:.*.*.*.*

```

**Figure S6.** PupB homologs encoded by ubonodin-susceptible strains harbor an N-terminal extension domain. The closest PupB homologs found by protein BLAST search against the 12 Bcc strains tested for ubonodin susceptibility were aligned with Clustal Omega. Only the N-terminal portion of the alignment is shown here. The start of the plug domain based on protein BLAST annotation of the ATCC 25416 PupB homolog is denoted in red text.



| <b>Strain</b>                              | <b>Ubonodin MIC (<math>\mu</math>M)</b> |
|--------------------------------------------|-----------------------------------------|
| <i>Burkholderia multivorans</i> AU30438    | 10                                      |
| <i>Burkholderia multivorans</i> ATCC 17616 | 20                                      |
| <i>Burkholderia cepacia</i> ATCC 25416     | 40                                      |
| <i>Burkholderia cenocepacia</i> AU0756     | 10                                      |
| <i>Burkholderia cenocepacia</i> AU24362    | 20                                      |
| <i>Burkholderia cenocepacia</i> J2315      | 20                                      |

**Table S1.** MICs of ubonodin against susceptible Bcc strains. Minimum inhibitory concentration measurements were obtained via M63 spot-on-lawn assay and observing for the lowest ubonodin concentration at which a zone of inhibition was clearly visible. MIC values for strains ATCC 17616 and ATCC 25416 were previously reported<sup>6</sup>.

| Predicted TBDT genes | Annotated function                                    | EcK-12 pident |
|----------------------|-------------------------------------------------------|---------------|
| GGFLHMPP_00194       | Ferrichrome receptor FcuA                             | 21.29         |
| GGFLHMPP_00997       | Vitamin B12 transporter BtuB                          | 17.17         |
| GGFLHMPP_01354       | Ferrichrome outer membrane transporter/phage receptor | 23.90         |
| GGFLHMPP_01381       | Ferric-pseudobactin BN7/BN8 receptor                  | 24.74         |
| GGFLHMPP_01830       | Ferrichrome outer membrane transporter/phage receptor | 34.04         |
| GGFLHMPP_01957       | Vitamin B12 transporter BtuB                          | 17.21         |
| GGFLHMPP_03614       | Fe(3+)-pyochelin receptor                             | 23.10         |
| GGFLHMPP_03754       | putative TonB-dependent receptor BfrD                 | 23.29         |
| GGFLHMPP_03764       | Vitamin B12 transporter BtuB                          | 15.48         |
| GGFLHMPP_03765       | Ferrichrome outer membrane transporter/phage receptor | 21.79         |
| GGFLHMPP_04498       | Vitamin B12 transporter BtuB                          | 20.28         |
| GGFLHMPP_04684       | Ferrichrome outer membrane transporter/phage receptor | 25.16         |
| GGFLHMPP_04786       | Vitamin B12 transporter BtuB                          | 16.18         |
| GGFLHMPP_04897       | Vitamin B12 transporter BtuB                          | 17.68         |
| GGFLHMPP_05058       | Ferric-anguibactin receptor Fata                      | 22.47         |
| GGFLHMPP_05298       | Vitamin B12 transporter BtuB                          | 15.37         |
| GGFLHMPP_05484       | putative TonB-dependent receptor BfrD                 | 21.47         |
| GGFLHMPP_05932       | putative TonB-dependent receptor                      | 16.03         |
| GGFLHMPP_05969       | Vitamin B12 transporter BtuB                          | 19.90         |
| GGFLHMPP_06227       | Fe(3+)-pyochelin receptor                             | 24.02         |
| GGFLHMPP_06471       | putative TonB-dependent receptor BfrD                 | 20.55         |
| GGFLHMPP_06887       | Ferrichrome outer membrane transporter/phage receptor | 23.88         |
| GGFLHMPP_06963       | Colicin I receptor                                    | 14.80         |
| GGFLHMPP_06967       | Vitamin B12 transporter BtuB                          | 16.72         |
| GGFLHMPP_07045       | Ferrichrome outer membrane transporter/phage receptor | 32.24         |
| GGFLHMPP_07356       | Vitamin B12 transporter BtuB                          | 16.83         |
| GGFLHMPP_07363       | Vitamin B12 transporter BtuB                          | 13.21         |
| GGFLHMPP_07399       | Pesticin receptor                                     | 17.02         |
| GGFLHMPP_07465       | Ferrichrome outer membrane transporter/phage receptor | 37.03         |

**Table S2.** Protein BLAST prediction of TonB-dependent transporters (TBDTs) encoded by *B. cepacia*. *E. coli* FhuA and 34 known and predicted *P. aeruginosa* TBDTs were queried against a protein BLAST database of ATCC 25416 built using the BLAST+ software package<sup>16</sup>. Only protein hits with an e-value < 0.05 and appearing as hits for multiple queries are shown here. For each TBDT homolog, the percent amino acid sequence identity (pident) to *E. coli* K-12 FhuA was calculated using Clustal Omega.

| Predicted TonB genes            | Annotated function | BcK56-2 pident | EcK-12 pident |
|---------------------------------|--------------------|----------------|---------------|
| GGFLHMPP_02544 ( <i>tonB1</i> ) | TonB               | 79.91          | 27.94         |
| GGFLHMPP_04892 ( <i>tonB2</i> ) | TonB               | 33.65          | 28.24         |
| GGFLHMPP_06959 ( <i>tonB3</i> ) | TonB               | 28.50          | 33.84         |
| GGFLHMPP_07362 ( <i>tonB4</i> ) | TonB               | 30.69          | 32.02         |

**Table S3.** Protein BLAST prediction of TonB homologs in *B. cepacia*. Confirmed TonB sequences from *B. cenocepacia* K56-2<sup>17</sup> and *B. mallei* ATCC 23344<sup>18</sup> were queried against the same protein BLAST database of ATCC 25416 as above. Only top hits having a single Phobius-predicted transmembrane domain are shown here. For each TonB homolog, the percent amino acid sequence identity (pident) to TonB from *B. cenocepacia* K56-2 and *E. coli* K-12 was calculated using Clustal Omega.

| Strain                 | - inducer, MIC ( $\mu\text{M}$ ) | + inducer, MIC ( $\mu\text{M}$ ) |
|------------------------|----------------------------------|----------------------------------|
| pSCrhaB2 control       | 40                               | 40                               |
| <i>tonB1</i> depletion | > 160                            | 40                               |
| WT                     | 20                               | na                               |
| $\Delta\textit{tonB2}$ | 20                               | na                               |
| $\Delta\textit{tonB3}$ | 20                               | na                               |
| $\Delta\textit{tonB4}$ | 20                               | na                               |

**Table S4.** MICs of ubonodin for *B. cepacia tonB* mutants. MIC was defined as the lowest concentration of ubonodin required to inhibit bacterial growth via spot-on-lawn assay. The *tonB1* depletion mutant was compared to the pSCrhaB2 empty vector control strain on LB agar  $\pm$  the inducer (0.2% L-rhamnose). For the *tonB2*, *tonB3*, and *tonB4* mutants for which the gene could be deleted, MICs were assessed against *B. cepacia* WT on plain LB agar. na indicates not applicable.

| Gene        | Log <sub>2</sub> fold change | Adjusted p-value | Annotated function                                      |
|-------------|------------------------------|------------------|---------------------------------------------------------|
| APZ15_13295 | -5.2567923                   | 7.81E-205        | hemolysin D                                             |
| APZ15_13300 | -5.1862897                   | 7.65E-202        | multidrug resistance protein B                          |
| APZ15_13330 | -4.9449433                   | 1.84E-157        | hypothetical protein                                    |
| APZ15_13325 | -4.7638721                   | 6.55E-153        | cystathionine beta-lyase                                |
| APZ15_13290 | -4.8560812                   | 5.49E-136        | multidrug RND transporter                               |
| APZ15_13320 | -4.7638147                   | 2.45E-132        | hypothetical protein                                    |
| APZ15_13265 | -4.4817844                   | 1.38E-127        | hypothetical protein                                    |
| APZ15_13335 | -4.5654781                   | 1.84E-125        | citrate lyase subunit beta                              |
| APZ15_13255 | -3.8753646                   | 2.07E-124        | 3-oxoacyl-ACP reductase                                 |
| APZ15_13260 | -4.4007282                   | 1.49E-112        | hypothetical protein                                    |
| APZ15_13310 | -4.5269245                   | 1.84E-108        | hypothetical protein                                    |
| APZ15_13340 | -4.4242902                   | 5.51E-108        | acyl-CoA dehydrogenase                                  |
| APZ15_12790 | -3.325007                    | 1.32E-99         | TonB-dependent receptor                                 |
| APZ15_12770 | -3.4803646                   | 2.29E-99         | non-ribosomal peptide synthetase                        |
| APZ15_13270 | -4.2575782                   | 3.25E-97         | thioesterase                                            |
| APZ15_12745 | -3.4658715                   | 1.24E-81         | cobalamin/Fe <sup>3+</sup> -siderophore ABC transporter |
| APZ15_13315 | -4.1908886                   | 1.05E-79         | glutamine amidotransferase                              |
| APZ15_12740 | -3.4299677                   | 2.04E-73         | hypothetical protein                                    |
| APZ15_12795 | -2.9688796                   | 2.19E-71         | N(5)-hydroxyornithine transformylase PvdF               |
| APZ15_13280 | -3.2718661                   | 1.60E-67         | glutamate--cysteine ligase                              |
| APZ15_12775 | -2.7586369                   | 2.13E-65         | non-ribosomal peptide synthetase                        |
| APZ15_13275 | -3.1975719                   | 1.75E-62         | phospho-2-dehydro-3-deoxyheptonate aldolase             |
| APZ15_12765 | -2.8563236                   | 6.22E-56         | peptide ABC transporter ATP-binding protein             |
| APZ15_12760 | -2.6778373                   | 5.44E-53         | iron ABC transporter substrate-binding protein          |
| APZ15_12785 | -2.8072399                   | 2.49E-52         | ornithine monooxygenase                                 |
| APZ15_12750 | -2.9528878                   | 1.09E-42         | iron ABC transporter                                    |
| APZ15_18790 | -2.1337118                   | 3.95E-42         | ligand-gated channel protein                            |
| APZ15_28835 | -2.2263542                   | 4.46E-37         | TonB-dependent receptor                                 |
| APZ15_12755 | -2.743308                    | 1.02E-34         | iron reductase                                          |
| APZ15_12735 | -3.0263176                   | 3.41E-32         | antibiotic synthesis protein MbtH                       |
| APZ15_16315 | -1.6894186                   | 1.16E-28         | biopolymer transporter                                  |
| APZ15_12800 | -2.0448781                   | 1.90E-24         | acetyl-CoA acetyltransferase                            |
| APZ15_28830 | -2.0801325                   | 2.35E-21         | hypothetical protein                                    |
| APZ15_28825 | -1.9648461                   | 8.26E-21         | Fe(II)-dependent oxygenase                              |
| APZ15_12730 | -2.2044701                   | 6.01E-19         | RNA polymerase subunit sigma-70                         |
| APZ15_12780 | -2.1739261                   | 9.44E-19         | ornibactin biosynthesis protein                         |
| APZ15_16320 | -1.5356345                   | 2.04E-18         | biopolymer transporter ExbD                             |
| APZ15_13305 | -2.352082                    | 7.60E-16         | hypothetical protein                                    |
| APZ15_16305 | -1.436329                    | 3.05E-13         | (2Fe-2S)-binding protein                                |
| APZ15_03205 | -1.2202139                   | 2.80E-12         | peptidase                                               |
| APZ15_09755 | -1.1039095                   | 3.75E-12         | iron ABC transporter substrate-binding protein          |
| APZ15_27265 | -1.2298424                   | 6.27E-12         | TonB-dependent receptor                                 |
| APZ15_09745 | -1.0976609                   | 1.90E-11         | ABC transporter                                         |
| APZ15_09750 | -1.072656                    | 6.92E-11         | iron ABC transporter permease                           |
| APZ15_04725 | -1.0998786                   | 1.41E-10         | acetyltransferase                                       |
| APZ15_16350 | -1.0260216                   | 9.36E-10         | FTR1 family iron permease                               |
| APZ15_16630 | -0.9849508                   | 1.68E-09         | hypothetical protein                                    |
| APZ15_22715 | -1.1368288                   | 9.35E-09         | TonB-dependent receptor                                 |
| APZ15_27905 | -0.9797576                   | 2.69E-08         | AraC family transcriptional regulator                   |
| APZ15_16345 | -0.939572                    | 1.20E-07         | hypothetical protein                                    |
| APZ15_04730 | -0.9347659                   | 2.08E-07         | hypothetical protein                                    |
| APZ15_16355 | -1.093043                    | 3.08E-07         | periplasmic lipoprotein involved in iron transport      |
| APZ15_16310 | -0.9727399                   | 6.01E-07         | energy transducer TonB                                  |
| APZ15_04900 | -0.8889021                   | 1.18E-06         | flagellar biosynthetic protein FlhB                     |
| APZ15_10610 | -1.2837685                   | 1.75E-06         | iron dicitrate transport regulator FecR                 |
| APZ15_16360 | -0.9521986                   | 1.99E-06         | hypothetical protein                                    |
| APZ15_23635 | -1.2306567                   | 2.27E-06         | heme ABC transporter                                    |
| APZ15_04150 | -0.897314                    | 7.25E-06         | flagellar basal body protein FliL                       |
| APZ15_18795 | -1.1516382                   | 8.61E-06         | phosphonoacetaldehyde dehydrogenase                     |
| APZ15_03255 | -0.7594545                   | 1.10E-05         | flagellar export protein FliJ                           |
| APZ15_16625 | -0.9256496                   | 1.13E-05         | carbonate dehydratase                                   |
| APZ15_32030 | -1.0078194                   | 1.14E-05         | Crp/Fnr family transcriptional regulator                |
| APZ15_34675 | -0.9235059                   | 1.35E-05         | hypothetical protein                                    |
| APZ15_18770 | -0.7711676                   | 1.47E-05         | L-asparagine permease                                   |
| APZ15_32780 | -1.1403315                   | 1.94E-05         | hypothetical protein                                    |
| APZ15_11800 | -1.0160764                   | 1.95E-05         | hypothetical protein                                    |
| APZ15_04905 | -0.7522172                   | 2.80E-05         | flagellar biosynthesis protein FlhA                     |
| APZ15_32675 | -0.929239                    | 4.76E-05         | acetoacetyl-CoA reductase                               |

| Gene        | Log <sub>2</sub> fold change | Adjusted p-value | Annotated function                                         |
|-------------|------------------------------|------------------|------------------------------------------------------------|
| APZ15_13250 | -0.8369174                   | 4.76E-05         | LysR family transcriptional regulator                      |
| APZ15_32715 | -0.9749203                   | 5.95E-05         | Crp/Fnr family transcriptional regulator                   |
| APZ15_04920 | -0.6763806                   | 6.84E-05         | RNA polymerase subunit sigma-70                            |
| APZ15_04145 | -0.7111133                   | 7.00E-05         | flagellar motor switch protein FliM                        |
| APZ15_17665 | -0.7959913                   | 7.31E-05         | porin                                                      |
| APZ15_02535 | -0.6960766                   | 7.31E-05         | adenosylmethionine-8-amino-7-oxononanoate aminotransferase |
| APZ15_11910 | -0.9078761                   | 8.70E-05         | hypothetical protein                                       |
| APZ15_11900 | -1.0983907                   | 0.00010956       | hypothetical protein                                       |
| APZ15_18775 | -0.6690793                   | 0.00011443       | aspartate ammonia-lyase                                    |
| APZ15_11935 | -0.9221637                   | 0.0001207        | hypothetical protein                                       |
| APZ15_04745 | -0.6528012                   | 0.0001207        | hypothetical protein                                       |
| APZ15_15590 | -0.974034                    | 0.00012489       | elements of external origin                                |
| APZ15_32765 | -1.0324918                   | 0.00015241       | heat-shock protein Hsp20                                   |
| APZ15_23630 | -1.0662754                   | 0.00021923       | hypothetical protein                                       |
| APZ15_24725 | -0.8031059                   | 0.00021923       | disulfide bond formation protein DsbA                      |
| APZ15_32735 | -0.8834857                   | 0.00024137       | hypothetical protein                                       |
| APZ15_30295 | -0.6488224                   | 0.00025835       | magnesium-translocating P-type ATPase                      |
| APZ15_12685 | -0.7372566                   | 0.00027478       | multidrug transporter                                      |
| APZ15_29005 | -0.7067352                   | 0.00028188       | aldehyde dehydrogenase                                     |
| APZ15_32025 | -0.8622411                   | 0.00033077       | two-component system response regulator                    |
| APZ15_11950 | -0.8733183                   | 0.00040075       | hypothetical protein                                       |
| APZ15_32040 | -0.7601469                   | 0.00042828       | UDP-glucose 4-epimerase                                    |
| APZ15_11940 | -0.855181                    | 0.00043772       | hypothetical protein                                       |
| APZ15_11945 | -0.8255062                   | 0.00049894       | hypothetical protein                                       |
| APZ15_20695 | -1.0518235                   | 0.00051336       | LysR family transcriptional regulator                      |
| APZ15_32775 | -0.9348605                   | 0.00062602       | universal stress protein UspA                              |
| APZ15_23290 | -0.7714645                   | 0.00067369       | RND transporter                                            |
| APZ15_11810 | -1.0121409                   | 0.00073253       | hypothetical protein                                       |
| APZ15_04910 | -0.5927964                   | 0.00093893       | flagellar biosynthesis protein FlhF                        |
| APZ15_03025 | -0.7108792                   | 0.00109459       | flagellar biosynthesis protein FlgB                        |
| APZ15_04740 | -0.5932888                   | 0.00113498       | aminotransferase                                           |
| APZ15_03030 | -0.706266                    | 0.0011765        | flagellar biosynthesis protein FlgA                        |
| APZ15_03015 | -0.5863948                   | 0.00138716       | flagellar biosynthesis protein FlgD                        |
| APZ15_02540 | -0.6095042                   | 0.00157553       | 8-amino-7-oxononanoate synthase                            |
| APZ15_11925 | -0.8095754                   | 0.00177245       | capsid protein                                             |
| APZ15_10615 | -0.8564602                   | 0.00180981       | TonB-dependent receptor                                    |
| APZ15_32750 | -0.8358495                   | 0.00183648       | UDP-glucose 4-epimerase                                    |
| APZ15_12465 | -0.7032582                   | 0.00210401       | hypothetical protein                                       |
| APZ15_02990 | -0.5695306                   | 0.0023691        | flagellar biosynthesis protein FlgI                        |
| APZ15_32690 | -0.8801278                   | 0.00255246       | universal stress protein UspA                              |
| APZ15_03235 | -0.6191817                   | 0.00266398       | flagellar M-ring protein FlIF                              |
| APZ15_32685 | -0.8261255                   | 0.0035032        | universal stress protein UspA                              |
| APZ15_03020 | -0.5933498                   | 0.0035803        | flagellar basal-body rod protein FlgC                      |
| APZ15_03000 | -0.5659602                   | 0.00391644       | flagellar basal-body rod protein FlgG                      |
| APZ15_32755 | -0.8088639                   | 0.00392311       | OsmY domain-containing protein                             |
| APZ15_10605 | -0.848607                    | 0.00396728       | RNA polymerase subunit sigma                               |
| APZ15_32045 | -0.6419302                   | 0.00402385       | hypothetical protein                                       |
| APZ15_19255 | -0.7101933                   | 0.00469326       | acyl-CoA dehydrogenase                                     |
| APZ15_11915 | -0.7530693                   | 0.00478994       | terminase                                                  |
| APZ15_23295 | -0.7136653                   | 0.00479821       | transporter                                                |
| APZ15_11980 | -0.724408                    | 0.00530614       | hypothetical protein                                       |
| APZ15_11960 | -0.754902                    | 0.00532469       | phage tail protein                                         |
| APZ15_23305 | -0.9064728                   | 0.00555347       | alpha/beta hydrolase                                       |
| APZ15_15610 | -0.9155299                   | 0.00562211       | hypothetical protein                                       |
| APZ15_15565 | -0.9818148                   | 0.00663219       | hypothetical protein                                       |
| APZ15_32720 | -0.7204696                   | 0.00701036       | alcohol dehydrogenase                                      |
| APZ15_09840 | -0.5767857                   | 0.00787882       | multidrug DMT transporter permease                         |
| APZ15_03010 | -0.5186136                   | 0.0085112        | flagellar biosynthesis protein FlgE                        |
| APZ15_15595 | -0.8027645                   | 0.00859944       | hypothetical protein                                       |
| APZ15_11930 | -0.6992373                   | 0.00909243       | serine peptidase                                           |
| APZ15_24145 | -0.7169041                   | 0.00998199       | oligopeptide transporter ATP-binding component             |
| APZ15_29025 | -0.6215902                   | 0.01022892       | AraC family transcriptional regulator                      |
| APZ15_03005 | -0.5094297                   | 0.01028862       | flagellar biosynthesis protein FlgF                        |
| APZ15_19250 | -0.7039549                   | 0.01160545       | alkylhydroperoxidase                                       |
| APZ15_03815 | -0.5297868                   | 0.0116385        | transcriptional regulator                                  |
| APZ15_15570 | -0.7762557                   | 0.01180211       | baseplate assembly protein                                 |
| APZ15_27885 | -0.9150165                   | 0.01182669       | salicylate biosynthesis isochorismate synthase             |
| APZ15_03230 | -0.5569556                   | 0.01235582       | flagellar hook-basal body protein FlIE                     |

| Gene        | Log <sub>2</sub> fold change | Adjusted p-value | Annotated function                    |
|-------------|------------------------------|------------------|---------------------------------------|
| APZ15_32770 | -0.8134205                   | 0.01284411       | hypothetical protein                  |
| APZ15_15575 | -0.8807171                   | 0.01299392       | hypothetical protein                  |
| APZ15_03240 | -0.53876                     | 0.01306504       | flagellar motor switch protein G      |
| APZ15_30140 | -0.5810739                   | 0.01371687       | RpiR family transcriptional regulator |
| APZ15_31900 | -0.7538066                   | 0.0137376        | hypothetical protein                  |
| APZ15_15510 | -0.8328544                   | 0.01386561       | hypothetical protein                  |
| APZ15_32605 | -0.6804217                   | 0.01448713       | glutamyl-tRNA amidotransferase        |
| APZ15_04140 | -0.518451                    | 0.01534227       | flagellar motor switch protein FliN   |
| APZ15_03250 | -0.5010897                   | 0.01574047       | flagellar protein export ATPase FliI  |
| APZ15_23300 | -0.681919                    | 0.0157919        | hemolysin secretion protein D         |
| APZ15_12015 | -0.7503335                   | 0.01602625       | hypothetical protein                  |
| APZ15_30055 | -0.5033759                   | 0.01635426       | hypothetical protein                  |
| APZ15_04735 | -0.5475086                   | 0.01740712       | transferase                           |
| APZ15_32725 | -0.7219855                   | 0.01749977       | nitroreductase                        |
| APZ15_13650 | -0.6190911                   | 0.01749977       | 2-nitropropane dioxygenase            |
| APZ15_24790 | -0.5560202                   | 0.01749977       | hypothetical protein                  |
| APZ15_11970 | -0.7633595                   | 0.01776252       | hypothetical protein                  |
| APZ15_23620 | -0.6589561                   | 0.01776252       | hypothetical protein                  |
| APZ15_15640 | -0.6753861                   | 0.01839132       | virulence protein E                   |
| APZ15_11825 | -0.7860047                   | 0.01882027       | hypothetical protein                  |
| APZ15_01730 | -0.5667234                   | 0.01882828       | phasin                                |
| APZ15_32035 | -0.6713348                   | 0.01901296       | metal ABC transporter ATPase          |
| APZ15_27910 | -0.8242034                   | 0.01955513       | non-ribosomal peptide synthetase      |
| APZ15_22585 | -0.5507485                   | 0.01955513       | hypothetical protein                  |
| APZ15_15550 | -0.7666421                   | 0.01977177       | phage tail protein                    |
| APZ15_27280 | -0.6920484                   | 0.01987505       | calmodulin-binding protein            |
| APZ15_11765 | -0.6279157                   | 0.01995868       | hypothetical protein                  |
| APZ15_02545 | -0.5635843                   | 0.02448592       | dethiobiotin synthetase               |
| APZ15_02995 | -0.462292                    | 0.02578117       | flagellar biosynthesis protein FlgH   |
| APZ15_17870 | -0.4727179                   | 0.0264617        | sodium:proton antiporter              |
| APZ15_29015 | -0.5224725                   | 0.02699779       | APC family amino acid permease        |
| APZ15_02550 | -0.5399154                   | 0.0272232        | biotin synthase                       |
| APZ15_29020 | -0.6208069                   | 0.02774693       | hypothetical protein                  |
| APZ15_04135 | -0.6321834                   | 0.02837945       | flagellar biosynthesis protein FliO   |
| APZ15_12000 | -0.5905935                   | 0.02892545       | hypothetical protein                  |
| APZ15_32660 | -0.6946013                   | 0.03259813       | alcohol dehydrogenase                 |
| APZ15_12030 | -0.6029607                   | 0.03259813       | hypothetical protein                  |
| APZ15_11770 | -0.6049316                   | 0.03280121       | hypothetical protein                  |
| APZ15_02945 | -0.5010202                   | 0.03338625       | hypothetical protein                  |
| APZ15_36700 | -0.4946904                   | 0.03491788       | peroxidase                            |
| APZ15_11815 | -0.6873014                   | 0.03621732       | hypothetical protein                  |
| APZ15_00980 | -0.4588859                   | 0.03812413       | peptidase                             |
| APZ15_01725 | -0.6294077                   | 0.04140059       | acetyl-CoA acetyltransferase          |
| APZ15_01720 | -0.5778491                   | 0.04594567       | acetoacetyl-CoA reductase             |
| APZ15_27900 | -0.7397357                   | 0.04597002       | 2,3-dihydroxybenzoate-AMP ligase      |
| APZ15_22795 | -0.7570074                   | 0.046404         | thioredoxin                           |
| APZ15_19675 | -0.5147006                   | 0.04968439       | polyamine ABC transporter permease    |

**Table S5.** Iron-repressed genes in *B. cepacia* identified using RNA-seq. Biological triplicate cultures of *B. cepacia* WT were grown in LB-Miller broth with and without excess iron (1 mM FeCl<sub>3</sub>) and total RNA was extracted for RNA-sequencing. Listed here are the genes which were significantly depleted (adjusted p-value < 0.05) in reads in the excess iron vs. baseline iron control. Genes were annotated according to the txid983594 NCBI genome file.

| Gene        | Log <sub>2</sub> fold change | Adjusted p-value | Annotated function                                      |
|-------------|------------------------------|------------------|---------------------------------------------------------|
| APZ15_06900 | 1.91420809                   | 1.09E-39         | FAD-dependent oxidoreductase                            |
| APZ15_07725 | 1.98170033                   | 1.01E-32         | FAD-dependent oxidoreductase                            |
| APZ15_28850 | 1.39793636                   | 8.66E-18         | aspartate carbamoyltransferase                          |
| APZ15_28575 | 1.50416225                   | 3.00E-15         | diaminopimelate decarboxylase                           |
| APZ15_15200 | 1.25721739                   | 4.71E-15         | RNA helicase                                            |
| APZ15_10115 | 1.14366                      | 3.99E-14         | MFS transporter                                         |
| APZ15_09900 | 1.08211004                   | 6.89E-11         | dihydrolipoamide dehydrogenase                          |
| APZ15_20500 | 1.37336253                   | 3.31E-09         | hypothetical protein                                    |
| APZ15_31115 | 1.0337914                    | 3.92E-09         | cold-shock protein                                      |
| APZ15_28135 | 0.9904126                    | 1.16E-08         | acyl-CoA dehydrogenase                                  |
| APZ15_31120 | 1.08537958                   | 2.91E-08         | translation initiation factor IF-1                      |
| APZ15_30695 | 1.00955689                   | 7.22E-08         | purine nucleoside phosphorylase                         |
| APZ15_09885 | 0.94986809                   | 9.13E-08         | 2-oxoisovalerate dehydrogenase                          |
| APZ15_09890 | 1.09980574                   | 9.52E-08         | 2-oxoisovalerate dehydrogenase                          |
| APZ15_01455 | 1.01566335                   | 1.20E-07         | acetyl-CoA acetyltransferase                            |
| APZ15_09895 | 1.06521424                   | 8.27E-07         | branched-chain alpha-keto acid dehydrogenase subunit E2 |
| APZ15_25535 | 0.96153372                   | 1.00E-06         | translation initiation factor IF-1                      |
| APZ15_28140 | 1.00359866                   | 1.83E-06         | AMP-dependent synthetase                                |
| APZ15_12565 | 0.84087118                   | 2.27E-06         | sulfate ABC transporter ATP-binding protein             |
| APZ15_12555 | 1.00949874                   | 2.40E-06         | sulfate transporter                                     |
| APZ15_08435 | 0.800105                     | 2.48E-06         | transglycosylase SLT domain protein                     |
| APZ15_07735 | 1.09002473                   | 2.76E-06         | 4-hydroxybenzoate transporter                           |
| APZ15_00200 | 0.83722808                   | 4.52E-06         | phosphoadenosine phosphosulfate reductase               |
| APZ15_30440 | 0.89420388                   | 1.22E-05         | peptidoglycan-binding protein                           |
| APZ15_07740 | 0.88938909                   | 1.50E-05         | homogentisate 1                                         |
| APZ15_04995 | 0.7451365                    | 1.82E-05         | hypothetical protein                                    |
| APZ15_25540 | 0.84004572                   | 2.37E-05         | hypothetical protein                                    |
| APZ15_20505 | 0.90085441                   | 2.37E-05         | cold-shock protein                                      |
| APZ15_29295 | 0.83463134                   | 2.70E-05         | hypothetical protein                                    |
| APZ15_00210 | 0.71786018                   | 3.75E-05         | sulfite reductase                                       |
| APZ15_00195 | 0.73293372                   | 4.18E-05         | sulfate adenyllyltransferase                            |
| APZ15_12550 | 0.77478241                   | 5.02E-05         | sulfate transporter subunit                             |
| APZ15_17130 | 0.77365421                   | 6.84E-05         | hypothetical protein                                    |
| APZ15_01585 | 0.7482411                    | 0.00011614       | disulfide bond formation protein DsbA                   |
| APZ15_00190 | 0.69756076                   | 0.0001406        | sulfate adenyllyltransferase                            |
| APZ15_12570 | 0.77804634                   | 0.00021567       | transcriptional regulator                               |
| APZ15_00205 | 0.76562431                   | 0.00025037       | oxidoreductase                                          |
| APZ15_14120 | 0.659274                     | 0.00025064       | 50S ribosomal protein L31 type B                        |
| APZ15_05115 | 0.8608476                    | 0.00033708       | hypothetical protein                                    |
| APZ15_22685 | 0.82683329                   | 0.00043592       | Rieske (2Fe-2S) protein                                 |
| APZ15_33075 | 0.69301732                   | 0.00049894       | AMP-binding protein                                     |
| APZ15_28145 | 0.77635369                   | 0.0005245        | methylmalonate-semialdehyde dehydrogenase               |
| APZ15_24225 | 0.7395028                    | 0.00057088       | hypothetical protein                                    |
| APZ15_12560 | 0.82100643                   | 0.00065658       | sulfate ABC transporter permease                        |
| APZ15_04765 | 0.69323257                   | 0.00071667       | 30S ribosomal protein S21                               |
| APZ15_25530 | 0.68233789                   | 0.00078172       | cold-shock protein                                      |
| APZ15_32350 | 0.68226213                   | 0.00092037       | acyl-CoA synthetase                                     |
| APZ15_28160 | 0.83860479                   | 0.00106075       | enoyl-CoA hydratase                                     |
| APZ15_29300 | 0.669446                     | 0.00132381       | inosine-5-monophosphate dehydrogenase                   |
| APZ15_31125 | 0.73478027                   | 0.00133893       | alpha/beta hydrolase                                    |
| APZ15_01460 | 0.73326785                   | 0.00154887       | 3-hydroxyacyl-CoA dehydrogenase                         |
| APZ15_07745 | 0.75770248                   | 0.00156618       | fumarylacetoacetase                                     |
| APZ15_25525 | 0.80251477                   | 0.00160611       | hypothetical protein                                    |
| APZ15_30655 | 0.66616312                   | 0.00311753       | nitrite reductase                                       |
| APZ15_28150 | 0.84628258                   | 0.00360042       | 3-hydroxyisobutyrate dehydrogenase                      |
| APZ15_01465 | 0.67011652                   | 0.00390782       | acyl-CoA dehydrogenase                                  |
| APZ15_30445 | 0.57527007                   | 0.00392311       | ionic transporter y4hA                                  |
| APZ15_01580 | 0.60280173                   | 0.00396728       | MarR family transcriptional regulator                   |
| APZ15_09010 | 0.5790859                    | 0.00436471       | electron transporter RnfB                               |
| APZ15_00430 | 0.64752188                   | 0.00455114       | 50S ribosomal protein L33                               |
| APZ15_13000 | 0.73562275                   | 0.00480821       | MFS transporter                                         |
| APZ15_15915 | 0.52577335                   | 0.00492687       | dihydrolipoamide dehydrogenase                          |
| APZ15_27260 | 0.59734348                   | 0.00499272       | aldehyde dehydrogenase                                  |
| APZ15_01885 | 0.53313563                   | 0.00524419       | 50S ribosomal protein L25                               |
| APZ15_28440 | 0.53304733                   | 0.00636981       | FAD-dependent oxidoreductase                            |
| APZ15_28570 | 0.94439741                   | 0.006799         | hypothetical protein                                    |
| APZ15_26585 | 0.5999219                    | 0.00689706       | hypothetical protein                                    |
| APZ15_00185 | 0.56291722                   | 0.00800886       | uroporphyrin-III methyltransferase                      |



| Gene        | Log <sub>2</sub> fold change | Adjusted p-value | Annotated function                              |
|-------------|------------------------------|------------------|-------------------------------------------------|
| APZ15_36230 | 0.82298664                   | 0.00806465       | hypothetical protein                            |
| APZ15_33290 | 0.53504889                   | 0.00890206       | adenylosuccinate synthetase                     |
| APZ15_09015 | 0.50858239                   | 0.01007729       | electron transfer flavoprotein subunit beta     |
| APZ15_01310 | 0.51344958                   | 0.01007729       | 3,4-dihydroxy-2-butanone 4-phosphate synthase   |
| APZ15_11075 | 0.53870635                   | 0.01044698       | hypothetical protein                            |
| APZ15_27520 | 0.5549963                    | 0.01110281       | amino acid permease                             |
| APZ15_11315 | 0.49799126                   | 0.01120352       | segregation and condensation protein B          |
| APZ15_09525 | 0.50714508                   | 0.01125699       | glycosyl transferase                            |
| APZ15_27145 | 0.57652094                   | 0.0113318        | hypothetical protein                            |
| APZ15_09445 | 0.74671603                   | 0.01201624       | tRNA-Cys                                        |
| APZ15_33335 | 0.51936803                   | 0.01299392       | flavodoxin                                      |
| APZ15_01635 | 0.67032477                   | 0.01386561       | L-lactate permease                              |
| APZ15_20275 | 0.50559183                   | 0.01536932       | multidrug ABC transporter ATP-binding protein   |
| APZ15_24875 | 0.49099683                   | 0.01573621       | L-threonine 3-dehydrogenase                     |
| APZ15_07810 | 0.57020705                   | 0.0157919        | aldehyde oxidase                                |
| APZ15_15260 | 0.55143005                   | 0.01799658       | tRNA-Glu                                        |
| APZ15_15275 | 0.51358101                   | 0.01839132       | tRNA-Ala                                        |
| APZ15_11265 | 0.67216077                   | 0.01955513       | tRNA-Pro                                        |
| APZ15_00215 | 0.54171092                   | 0.02019257       | transcriptional regulator                       |
| APZ15_11215 | 0.61201103                   | 0.02144406       | 50S ribosomal protein L35                       |
| APZ15_00130 | 0.62292681                   | 0.02234378       | hypothetical protein                            |
| APZ15_09005 | 0.5460626                    | 0.02247356       | metal ABC transporter substrate-binding protein |
| APZ15_30625 | 0.68911852                   | 0.02312619       | small multidrug resistance protein              |
| APZ15_08685 | 0.5612836                    | 0.02448592       | tRNA-Arg                                        |
| APZ15_38340 | 0.54335499                   | 0.02479318       | hypothetical protein                            |
| APZ15_23255 | 0.51858806                   | 0.02497578       | alpha/beta hydrolase                            |
| APZ15_29290 | 0.49620924                   | 0.02522311       | transcription elongation factor GreAB           |
| APZ15_15910 | 0.52516335                   | 0.02607509       | Phasin (PHA-granule associated protein)         |
| APZ15_14315 | 0.57472864                   | 0.0273288        | primosomal replication protein N                |
| APZ15_33065 | 0.60943008                   | 0.02774693       | acetyl-CoA acetyltransferase                    |
| APZ15_00255 | 0.78034177                   | 0.02818741       | hypothetical protein                            |
| APZ15_01470 | 0.49761175                   | 0.03050504       | TetR family transcriptional regulator           |
| APZ15_09345 | 0.54609289                   | 0.03195523       | anti-sigma factor                               |
| APZ15_03790 | 0.75848086                   | 0.0343863        | hypothetical protein                            |
| APZ15_14080 | 0.50346178                   | 0.03447661       | recombination protein RecR                      |
| APZ15_05140 | 0.45325301                   | 0.03621732       | orotate phosphoribosyltransferase               |
| APZ15_00220 | 0.46722262                   | 0.03812413       | branched-chain amino acid ABC transporter       |
| APZ15_09000 | 0.47130162                   | 0.03812413       | DL-methionine transporter permease subunit      |
| APZ15_25510 | 0.64047535                   | 0.03812413       | hypothetical protein                            |
| APZ15_36235 | 0.72832502                   | 0.03930393       | hypothetical protein                            |
| APZ15_14305 | 0.51727277                   | 0.04040064       | 50S ribosomal protein L9                        |
| APZ15_33330 | 0.43597969                   | 0.04247427       | TetR family transcriptional regulator           |
| APZ15_15990 | 0.45178395                   | 0.04252509       | glutamine synthetase                            |
| APZ15_30615 | 0.46238751                   | 0.04255752       | 4-hydroxybenzoate polyprenyltransferase         |
| APZ15_28450 | 0.48053396                   | 0.04437748       | glutamine synthetase                            |
| APZ15_03960 | 0.72011341                   | 0.0448486        | hypothetical protein                            |

**Table S6.** Iron-induced genes in *B. cepacia* identified using RNA-seq. Biological triplicate cultures of *B. cepacia* WT were grown in LB-Miller broth with and without excess iron (1 mM FeCl<sub>3</sub>) and total RNA was extracted for RNA-sequencing. Listed here are the genes which were significantly enriched (adjusted p-value < 0.05) in reads in the excess iron vs. baseline iron control. Genes were annotated according to the txid983594 NCBI genome file.

| Gene        | Alternate ID   | Log <sub>2</sub> fold change | Adjusted p-value |
|-------------|----------------|------------------------------|------------------|
| APZ15_04770 | GGFLHMPP_00194 | -0.1111778                   | 0.90451401       |
| APZ15_08735 | GGFLHMPP_00997 | 0.13912742                   | 0.91748674       |
| APZ15_10485 | GGFLHMPP_01354 | -0.204374                    | 0.6603581        |
| APZ15_10615 | GGFLHMPP_01381 | -0.8564602                   | 0.00180981       |
| APZ15_12790 | GGFLHMPP_01830 | -3.325007                    | 1.32E-99         |
| APZ15_13410 | GGFLHMPP_01957 | 0.14447575                   | 0.90697819       |
| APZ15_27935 | GGFLHMPP_03614 | -0.7151476                   | 0.05463782       |
| APZ15_27265 | GGFLHMPP_03754 | -1.2298424                   | 6.27E-12         |
| APZ15_27220 | GGFLHMPP_03764 | 0.22152038                   | 0.73069008       |
| APZ15_27215 | GGFLHMPP_03765 | 0.19488369                   | 0.79398094       |
| APZ15_23630 | GGFLHMPP_04498 | -1.0662754                   | 0.00021923       |
| APZ15_22715 | GGFLHMPP_04684 | -1.1368288                   | 9.35E-09         |
| APZ15_22220 | GGFLHMPP_04786 | 0.22195034                   | na               |
| APZ15_21665 | GGFLHMPP_04897 | -0.2766623                   | 0.5573478        |
| APZ15_20880 | GGFLHMPP_05058 | 0.04293992                   | 0.9741139        |
| APZ15_19710 | GGFLHMPP_05298 | 0.20919784                   | 0.85813846       |
| APZ15_18790 | GGFLHMPP_05484 | -2.1337118                   | 3.95E-42         |
| APZ15_31445 | GGFLHMPP_05932 | -0.0100092                   | 0.99603049       |
| APZ15_31265 | GGFLHMPP_05969 | 0.09141988                   | 0.93973097       |
| APZ15_30000 | GGFLHMPP_06227 | -0.0493401                   | 0.97595085       |
| APZ15_28835 | GGFLHMPP_06471 | -2.2263542                   | 4.46E-37         |
| APZ15_34675 | GGFLHMPP_06887 | -0.9235059                   | 1.35E-05         |
| APZ15_35050 | GGFLHMPP_06963 | 0.00671347                   | 0.99603049       |
| APZ15_35070 | GGFLHMPP_06967 | -0.0902081                   | 0.9359056        |
| APZ15_35470 | GGFLHMPP_07045 | 0.02189847                   | 0.99071542       |
| APZ15_36965 | GGFLHMPP_07356 | 0.02566865                   | 0.99071542       |
| APZ15_36995 | GGFLHMPP_07363 | 0.08616953                   | 0.95730836       |
| APZ15_37180 | GGFLHMPP_07399 | -0.0724437                   | 0.95741494       |
| APZ15_37495 | GGFLHMPP_07465 | 0.02978422                   | na               |

**Table S7.** Summary of RNA-seq data showing how excess iron affects the expression of genes encoding putative *B. cepacia* TBDTs. The log<sub>2</sub> fold change in read counts (excess iron/baseline iron) is shown for the 29 predicted *B. cepacia* TBDTs, with TBDT genes exhibiting significant changes (adjusted p-value < 0.05) highlighted in red. na indicates that there were insufficient data to calculate the adjusted p-value.

| <b>Regulated operon</b> | <b>Fur DNA-binding site sequence (5' to 3')</b> |
|-------------------------|-------------------------------------------------|
| fagA-fumC-orfX-sodA     | GAAAACAATAATCAATCTC                             |
| fagA-fumC-orfX-sodA     | AATAATCAATCTCATTATC                             |
| pchR                    | GAGATTTATTATCATTGGC                             |
| pchR                    | GGAAATGAGATTTATTATC                             |
| pvdS                    | GTAATTGACAATCATTATC                             |
| phuSTUVW                | CAAAACGCATATCTGAATC                             |
| phuR                    | GATAATTATTTGCATTAGC                             |

**Table S8.** Experimentally-determined DNA-binding sites of the *P. aeruginosa* ferric uptake regulator (Fur) protein<sup>11</sup>. Some operons contain two Fur boxes upstream.

| Strain                                            | Genotype*                                                                                       | Source           |
|---------------------------------------------------|-------------------------------------------------------------------------------------------------|------------------|
| <i>Escherichia coli</i>                           |                                                                                                 |                  |
| XL1-Blue                                          | Wild-type                                                                                       | Lab strain stock |
| DH5 $\alpha$                                      | Wild-type                                                                                       | Lab strain stock |
| CC118( $\lambda$ pir)                             | Wild-type                                                                                       | Zemer Gitai      |
| S17-1( $\lambda$ pir)                             | Wild-type                                                                                       | Zemer Gitai      |
| BL21                                              | Wild-type                                                                                       | Lab strain stock |
| BL21(DE3) $\Delta$ <i>slyD</i>                    | $\Delta$ <i>slyD</i> mutant in BL21(DE3) background                                             | Lab strain stock |
| <i>Burkholderia cepacia</i>                       |                                                                                                 |                  |
| ATCC 25416                                        | Wild-type                                                                                       | ATCC             |
| TD042                                             | ATCC 25416 $\Delta$ GGFLHMPP_06959 ( <i>tonB3</i> )::TpTer                                      | This study       |
| TD075                                             | ATCC 25416 $\Delta$ GGFLHMPP_00610 ( <i>fur</i> )::Km;<br>pSCrhaB2- <i>fur</i>                  | This study       |
| TD078                                             | ATCC 25416 $\Delta$ GGFLHMPP_07362 ( <i>tonB4</i> )::Km                                         | This study       |
| TD080                                             | ATCC 25416; pSCrhaB2                                                                            | This study       |
| TD090                                             | ATCC 25416 $\Delta$ GGFLHMPP_04892 ( <i>tonB2</i> )::TpTer                                      | This study       |
| TD091                                             | ATCC 25416 $\Delta$ GGFLHMPP_02544 ( <i>tonB1</i> )::Km;<br>pSCrhaB2- <i>tonB1</i>              | This study       |
| TD103                                             | ATCC 25416 $\Delta$ GGFLHMPP_01381 ( <i>pupB</i> )::Km                                          | This study       |
| TD118                                             | ATCC 25416 $\Delta$ GGFLHMPP_01381 ( <i>pupB</i> )::Km;<br>pSCrhaB2-APZ15_10615 ( <i>pupB</i> ) | This study       |
| TD122                                             | ATCC 25416 $\Delta$ GGFLHMPP_00373 ( <i>yddA</i> )::TpTer                                       | This study       |
| Other <i>Burkholderia cepacia</i> complex strains |                                                                                                 |                  |
| AU0158                                            | <i>Burkholderia dolosa</i> AU0158 wild-type                                                     | John LiPuma      |
| AU0756                                            | <i>Burkholderia cenocepacia</i> AU0756 wild-type                                                | John LiPuma      |
| AU3578                                            | <i>Burkholderia vietnamiensis</i> AU3578 wild-type                                              | John LiPuma      |
| AU15814                                           | <i>Burkholderia multivorans</i> AU15814 wild-type                                               | John LiPuma      |
| AU21726                                           | <i>Burkholderia vietnamiensis</i> AU21726 wild-type                                             | John LiPuma      |
| AU24362                                           | <i>Burkholderia cenocepacia</i> AU24362 wild-type                                               | John LiPuma      |
| AU30438                                           | <i>Burkholderia multivorans</i> AU30438 wild-type                                               | John LiPuma      |
| AMMD                                              | <i>Burkholderia ambifaria</i> AMMD wild-type                                                    | John LiPuma      |
| J2315                                             | <i>Burkholderia cenocepacia</i> J2315 wild-type                                                 | John LiPuma      |
| PC543                                             | <i>Burkholderia dolosa</i> PC543 wild-type                                                      | John LiPuma      |

**Table S9.** Bacterial strains used in this study. \*Abbreviations: TpTer, trimethoprim resistance; Km, kanamycin resistance. GGFLHMPP gene designations are derived from the ATCC 25416 genome file downloaded from the ATCC Genome Portal in the GenBank format. APZ15 gene designations are derived from the ATCC 25416 genome file (txid983594) downloaded from NCBI in the GenBank format.

| Plasmid              | Description*                                                                                                                                                                                                          | Source                      |
|----------------------|-----------------------------------------------------------------------------------------------------------------------------------------------------------------------------------------------------------------------|-----------------------------|
| pRK2013              | Triparental mating helper plasmid (Km <sup>R</sup> , ColE1 ori)                                                                                                                                                       | Figurski and Helinski, 1979 |
| pWC99                | pQE-80L-P <sub>T5</sub> : <i>uboA</i> -P <sub>mcbBCD</sub> - <i>uboBCD</i> (Amp <sup>R</sup> , ColE1 ori)                                                                                                             | Cheung-Lee et al., 2020     |
| pSCrhaB2             | Rhamnose-inducible expression vector for <i>B. cepacia</i> (Tp <sup>R</sup> , pBBR1 ori)                                                                                                                              | Cardona and Valvano, 2005   |
| pYTK001              | Template plasmid to amplify the PGphD promoter sequence (Cm <sup>R</sup> , ColE1 ori)                                                                                                                                 | Lee et al., 2015            |
| pET28a-mCherry-CNA35 | Template plasmid to amplify mCherry dropout reporter (Km <sup>R</sup> , ColE1 ori)                                                                                                                                    | Aper et al., 2014           |
| p34E-Km              | Template plasmid to amplify Km <sup>R</sup> marker for allelic replacement in <i>B. cepacia</i> (Amp <sup>R</sup> , ColE1 ori)                                                                                        | Shastri et al., 2017        |
| p34E-TpTer           | Template plasmid to amplify TpTer marker with transcription terminator for allelic replacement in <i>B. cepacia</i> (Amp <sup>R</sup> , ColE1 ori)                                                                    | Shastri et al., 2017        |
| pSHAFT3              | Suicide vector for one-step allelic replacement in <i>B. cepacia</i> (Amp <sup>R</sup> , Cm <sup>R</sup> , oriR6K)                                                                                                    | Shastri et al., 2017        |
| pRSFDuet-1           | Plasmid for dual protein overexpression in <i>E. coli</i> (Km <sup>R</sup> , RSF1030-derived RSF ori)                                                                                                                 | Lab strain stock            |
| pTD005               | pSHAFT3-ΔGGFLHMPP_06959 ( <i>tonB3</i> ):TpTer to make <i>tonB3</i> knockout in ATCC 25416 (Amp <sup>R</sup> , Cm <sup>R</sup> , Tp <sup>R</sup> , oriR6K)                                                            | This study                  |
| pTD013               | pSCrhaB2-GGFLHMPP_00610 ( <i>fur</i> ) for <i>fur</i> overexpression (Tp <sup>R</sup> , pBBR1 ori)                                                                                                                    | This study                  |
| pTD014               | pSHAFT3 derivative compatible with Golden Gate cloning.                                                                                                                                                               | This study                  |
| pTD016               | pSHAFT3-Amp <sup>R</sup> Cyt717Ade-Bsal-PGphD-mCherry-Bsal pTD014-ΔGGFLHMPP_00610 ( <i>fur</i> ):Km to knock out chromosomal <i>fur</i> in ATCC 25416 (Amp <sup>R</sup> , Cm <sup>R</sup> , Km <sup>R</sup> , oriR6K) | This study                  |
| pTD017               | pSHAFT3-ΔGGFLHMPP_07362 ( <i>tonB4</i> ):Km to make <i>tonB4</i> knockout in ATCC 25416 (Amp <sup>R</sup> , Cm <sup>R</sup> , Km <sup>R</sup> , oriR6K)                                                               | This study                  |
| pTD019               | pTD014-ΔGGFLHMPP_02544 ( <i>tonB1</i> ):Km to knock out chromosomal <i>tonB1</i> in ATCC 25416 (Amp <sup>R</sup> , Cm <sup>R</sup> , Km <sup>R</sup> , oriR6K)                                                        | This study                  |
| pTD020               | pSCrhaB2-GGFLHMPP_02544 ( <i>tonB1</i> ) for <i>tonB1</i> overexpression (Tp <sup>R</sup> , pBBR1 ori)                                                                                                                | This study                  |
| pTD022               | pTD014-ΔGGFLHMPP_04892 ( <i>tonB2</i> ):TpTer to make <i>tonB2</i> knockout in ATCC 25416 (Amp <sup>R</sup> , Cm <sup>R</sup> , Tp <sup>R</sup> , oriR6K)                                                             | This study                  |
| pTD023               | pTD014-ΔGGFLHMPP_01381 ( <i>pupB</i> ):Km to make <i>pupB</i> knockout in ATCC 25416 (Amp <sup>R</sup> , Cm <sup>R</sup> , Km <sup>R</sup> , oriR6K)                                                                  | This study                  |
| pTD027               | pRSFDuet-1-GGFLHMPP_02544 ( <i>tonB1</i> ) (Km <sup>R</sup> , RSF1030 ori)                                                                                                                                            | This study                  |
| pTD029               | pSCrhaB2-APZ15_10615 ( <i>pupB</i> ) for <i>pupB</i> overexpression (Tp <sup>R</sup> , pBBR1 ori)                                                                                                                     | This study                  |
| pTD030               | pRSFDuet-1-GGFLHMPP_02544 ( <i>tonB1</i> )-APZ15_10615 ( <i>pupB</i> ) (Km <sup>R</sup> , RSF1030 ori)                                                                                                                | This study                  |
| pTD031               | pRSFDuet-1-APZ15_10615 ( <i>pupB</i> ) (Km <sup>R</sup> , RSF1030 ori)                                                                                                                                                | This study                  |
| pTD032               | pTD014-ΔGGFLHMPP_00373 ( <i>yddA</i> ):TpTer to make <i>yddA</i> knockout in ATCC 25416 (Amp <sup>R</sup> , Cm <sup>R</sup> , Tp <sup>R</sup> , oriR6K)                                                               | This study                  |

**Table S10.** Plasmids used in this study. \*Abbreviations: TpTer/Tp/Tp<sup>R</sup>, trimethoprim resistance; Km/Km<sup>R</sup>, kanamycin resistance; Amp<sup>R</sup>, ampicillin resistance; Cm<sup>R</sup>, chloramphenicol resistance. GGFLHMPP gene designations are derived from the ATCC 25416 genome file downloaded from the ATCC Genome Portal in the GenBank format. APZ15 gene designations are derived from the ATCC 25416 genome file (txid983594) downloaded from NCBI in the GenBank format.

| <b>Primer</b> | <b>Sequence (5' to 3')</b>                       |
|---------------|--------------------------------------------------|
| oTD011        | GCTCGAATTCTATGCACGAACCCAGTTGACATAAGCCTGTTCCGGTTC |
| oTD012        | CCTACTCTCTTAGGCCACACGTTCAAGTG                    |
| oTD013        | GTGTGGCCTAAGAGAGTAGGGAACTGCCAG                   |
| oTD014        | GCTCGAATTTCGACAGGAAGAGTTTGTAGAAACGCAAAAAGG       |
| oTD015        | CGACTCACTATAGGGAGACC                             |
| oTD016        | TACAAGCTTGCATGCCTG                               |
| oTD025        | TTTAATCTAGAAACCTTGTGCGATCGACGC                   |
| oTD026        | TTTAAGAATTCACGACACGTTTCGTCGAATC                  |
| oTD027        | TTTAAGGTCTCGCATAGTTCCGGTCCAGTTGCAAC              |
| oTD028        | TTTAAGGTCTCCTGTCTTCAACCTGAACTGACGGG              |
| oTD029        | TAATTGGTCTCTTATGCACGAACCCAGTTGAC                 |
| oTD030        | TTTAAGGTCTCTGACAGGAAGAGTTTGTAGAAACGC             |
| oTD035        | GTAACGAGAAGGTCGCGAATTC                           |
| oTD036        | CGCTTCTGCGTTCTGATTTAATCTG                        |
| oTD039        | CTTCAGCTGATGTGTGATAACATACTG                      |
| oTD040        | ATGTAACGCACTGAGAAGCC                             |
| oTD043        | AATACCAACCGACGACTTGAC                            |
| oTD044        | ACAAGAAGGATTCGACATGGG                            |
| oTD045        | TGTTTCGACACCGATCCG                               |
| oTD046        | TCCATCACGGACTTGTTGC                              |
| oTD062        | TTTCAACATCTTCCCGGACG                             |
| oTD063        | ACGATGGAAGTGGAACTGC                              |
| oTD064        | TTTAAGGTCTCTACCGCGAGAACCACG                      |
| oTD065        | CTGACAACGATCGGAGGAC                              |
| oTD068        | TTTAATCTAGAGTGATAGATGCCCCACACC                   |
| oTD071        | TTTAAGAATTCATTAAGGCGGTGTGCGAG                    |
| oTD076        | TTTAAGAATTCGAGACCGAAAGTGAAACGTGA                 |
| oTD078        | CCTTAGAAACCATCTAGTATTTCTCCTCTTTCTCTAGTAGCTAAG    |
| oTD079        | GAGGAGAAATACTAGATGGTTTCTAAGGGCGAAGAG             |
| oTD080        | TTTAATCTAGAGAGACCTCACTTGTATAACTCATCCATGCCACC     |
| oTD083        | TTTAACATATGACCAATCCGACGGATCT                     |
| oTD084        | TTTAAGGATCCTCAGTGCTTTCGCGGTGC                    |
| oTD089        | TCATGATCAGCGCCTCAC                               |
| oTD090        | GGCGAGAGACTTTATCGATCG                            |
| oTD091        | CCTCGTCTTGGAGTTCATTGAG                           |
| oTD092        | GGTCTTGTGATCAGGATGATC                            |
| oTD093        | ACTGGGCACAACAGACAATC                             |
| oTD094        | TTTAAGGTCTCGAATTTTCGCATCCTGGTCGAC                |
| oTD095        | TTTAAGGTCTCTCCATCGGATTGGTCATGGCTAGG              |
| oTD096        | TTTAAGGTCTCGACGCCAAGCACTGAAATCCAGCC              |
| oTD097        | TTTAAGGTCTCTCTAGGCCATTTTCCGATCAACGG              |
| oTD098        | TTTAAGGTCTCGATGGACAGCAAGCGAACC                   |
| oTD099        | TTTAAGGTCTCTGCGTCGAATTAATTCCGCGA                 |
| oTD104        | TTGCTGTCCATCTTTCAGTCCCCCAACGC                    |
| oTD105        | ATTCGACGCAACCTGAACTGACCCGTG                      |
| oTD106        | GGACTGAAGATGGACAGCAAGCGAACC                      |
| oTD107        | CAGTTCAGGTTGCGTTCGAATTAATTCCGCGA                 |
| oTD114        | TTTAAGGTCTCGAATTTTCAAGGGTCCGATGACC               |
| oTD115        | TTTAAGGTCTCTCCATGATTCATACGTGGTGCAGC              |

---

|                 |                                          |
|-----------------|------------------------------------------|
| oTD116          | TTTAAGGTCTCGACGCCCGTCATATTCGGTAGATTCAAAG |
| oTD117          | TTTAAGGTCTCTCTAGAGAATGCGGTCATGATCAGC     |
| oTD118          | ACCATTTCTCGCCGAAC                        |
| oTD119          | CCGGTGTTCAATTGCCATG                      |
| oTD120          | TTTAACATATGAATCCCCGAGTGATCG              |
| oTD121          | TTTAAGGATCCTTAGTCGTCGAGCGTGAAG           |
| oTD128          | TTTAAGGTCTCGAATTCGAAAGGTTTCCTGAGCGC      |
| oTD129          | TTTAAGGTCTCGCATAGCTCGACTCCTTGCAATGA      |
| oTD130          | TTTAAGGTCTCCTGTCTGATTTCAAGCTGGGCTGAC     |
| oTD131          | TTTAAGGTCTCTCTAGACGCACGAAGAAGTTGTACG     |
| oTD132          | AACGAGTTCCAGGCGATC                       |
| oTD133          | GAAATCGGTTGCCGAACGC                      |
| oTD134          | TTTAAGGTCTCGAATTCTCGTCCTCGATACCGACA      |
| oTD135          | TTTAAGGTCTCTCCATCATGATCGGGAAGTCGGT       |
| oTD136          | TTTAAGGTCTCGACGCCAGTTCTGACCACGCAATC      |
| oTD137          | TTTAAGGTCTCTCTAGATTCTGATCCATCGTCGC       |
| oTD142          | GTGTTGCGTTCCGACATC                       |
| oTD143          | GACGAGCCGTTCAACAAC                       |
| oTD144          | TATTCGCAGTCGCTGAAGC                      |
| oTD151          | AAGCGTTATCTCGTGAAGGC                     |
| oTD152          | ACCTTGACACCATACGTTT                      |
| oTD168          | TTTAAGGTCTCCCATGAATCCCCGAGTGATCG         |
| oTD169          | TTTAAAAGCTTTTAGTCGTCGAGCGTGAAG           |
| oTD170          | TTTAACCTAGGTCAGAACTGCAGCGTGG             |
| oTD172          | ATGATCGTGTCTGCGTG                        |
| oTD173          | TTTAACATATGGGTAATGAAAGCAGCACTG           |
| oTD174          | TTTAAAAGCTTTTCAAGAACTGCAGCGTGG           |
| oTD175          | TTTAAGGTCTCGAATTCTGTCCCGGACGTTTCATC      |
| oTD176          | TTTAAGGTCTCGCATAGTGCTTCCTGATGAGTAGCC     |
| oTD177          | TTTAAGGTCTCCTGTCTGTAACGACAGCGACAAG       |
| oTD178          | TTTAAGGTCTCTCTAGAGACTGCGTTGACGGTGAT      |
| oTD179          | TCGATGTGGACGATCTGC                       |
| oTD180          | CTGGAAGAAAACGGGTTTCG                     |
| pRSFDuet-MCS1-F | CCCCTGTAGAAATAATTTTGTTTAACTTTAATAAAG     |
| pRSFDuet-MCS1-R | CGATTATGCGGCCGT                          |
| pRSFDuet-MCS2-F | ATAACAATTCCCCATCTTAGTATATTAGTTAAGTATAAG  |
| pRSFDuet-MCS2-R | GTTATGCTAGTTATTGCTCAGCG                  |

---

**Table S11.** Oligos used in this study.

## REFERENCES

- (1) Lee, M. E.; DeLoache, W. C.; Cervantes, B.; Dueber, J. E. A Highly Characterized Yeast Toolkit for Modular, Multipart Assembly. *Acs Synth Biol* **2015**, *4* (9), 975–986. <https://doi.org/10.1021/sb500366v>.
- (2) Aper, S. J. A.; Spreeuwel, A. C. C. van; Turnhout, M. C. van; Linden, A. J. van der; Pieters, P. A.; Zon, N. L. L. van der; Rambelje, S. L. de la; Bouten, C. V. C.; Merckx, M. Colorful Protein-Based Fluorescent Probes for Collagen Imaging. *PLoS One* **2014**, *9* (12), e114983. <https://doi.org/10.1371/journal.pone.0114983>.
- (3) Shastri, S.; Spiewak, H. L.; Sofoluwe, A.; Eidsvaag, V. A.; Asghar, A. H.; Pereira, T.; Bull, E. H.; Butt, A. T.; Thomas, M. S. An Efficient System for the Generation of Marked Genetic Mutants in Members of the Genus Burkholderia. *Plasmid* **2017**, *89*, 49–56. <https://doi.org/10.1016/j.plasmid.2016.11.002>.
- (4) Aubert, D. F.; Hamad, M. A.; Valvano, M. A. Host-Bacteria Interactions, Methods and Protocols. *Methods Mol Biology* **2014**, *1197*, 311–327. [https://doi.org/10.1007/978-1-4939-1261-2\\_18](https://doi.org/10.1007/978-1-4939-1261-2_18).
- (5) Figurski, D. H.; Helinski, D. R. Replication of an Origin-Containing Derivative of Plasmid RK2 Dependent on a Plasmid Function Provided in Trans. *Proc National Acad Sci* **1979**, *76* (4), 1648–1652. <https://doi.org/10.1073/pnas.76.4.1648>.
- (6) Cheung-Lee, W. L.; Parry, M. E.; Zong, C.; Cartagena, A. J.; Darst, S. A.; Connell, N. D.; Russo, R.; Link, A. J. Discovery of Ubonodin, an Antimicrobial Lasso Peptide Active against Members of the Burkholderia Cepacia Complex. *Chembiochem* **2020**, *21* (9), 1335–1340. <https://doi.org/10.1002/cbic.201900707>.
- (7) Winsor, G. L.; Khaira, B.; Rossum, T. V.; Lo, R.; Whiteside, M. D.; Brinkman, F. S. L. The Burkholderia Genome Database: Facilitating Flexible Queries and Comparative Analyses. *Bioinformatics* **2008**, *24* (23), 2803–2804. <https://doi.org/10.1093/bioinformatics/btn524>.
- (8) Sievers, F.; Wilm, A.; Dineen, D.; Gibson, T. J.; Karplus, K.; Li, W.; Lopez, R.; McWilliam, H.; Remmert, M.; Söding, J.; et al. Fast, Scalable Generation of High-Quality Protein Multiple Sequence Alignments Using Clustal Omega. *Mol Syst Biol* **2011**, *7* (1), 539–539. <https://doi.org/10.1038/msb.2011.75>.
- (9) Pinu, F. R.; Villas-Boas, S. G.; Aggio, R. Analysis of Intracellular Metabolites from Microorganisms: Quenching and Extraction Protocols. *Metabolites* **2017**, *7* (4), 53. <https://doi.org/10.3390/metabo7040053>.
- (10) Wasserman, W. W.; Sandelin, A. Applied Bioinformatics for the Identification of Regulatory Elements. *Nat Rev Genet* **2004**, *5* (4), 276–287. <https://doi.org/10.1038/nrg1315>.
- (11) Dudek, C.-A.; Jahn, D. PRODORIC: State-of-the-Art Database of Prokaryotic Gene Regulation. *Nucleic Acids Res* **2021**, *50* (D1), D295–D302. <https://doi.org/10.1093/nar/gkab1110>.
- (12) Ochsner, U. A.; Vasil, A. I.; Vasil, M. L. Role of the Ferric Uptake Regulator of Pseudomonas Aeruginosa in the Regulation of Siderophores and Exotoxin A Expression: Purification and Activity on Iron-Regulated Promoters. *J Bacteriol* **1995**, *177* (24), 7194–7201. <https://doi.org/10.1128/jb.177.24.7194-7201.1995>.
- (13) Hassett, D. J.; Howell, M. L.; Ochsner, U. A.; Vasil, M. L.; Johnson, Z.; Dean, G. E. An Operon Containing *fumC* and *sodA* Encoding Fumarase C and Manganese Superoxide Dismutase Is Controlled by the Ferric Uptake Regulator in Pseudomonas Aeruginosa: Fur Mutants Produce Elevated Alginate Levels. *J Bacteriol* **1997**, *179* (5), 1452–1459. <https://doi.org/10.1128/jb.179.5.1452-1459.1997>.
- (14) Ochsner, U. A.; Johnson, Z.; Vasil, M. L. Genetics and Regulation of Two Distinct Haem-Uptake Systems, Phu and Has, in Pseudomonas Aeruginosa. *Microbiology+* **2000**, *146* (1), 185–198. <https://doi.org/10.1099/00221287-146-1-185>.



- (15) Bailey, T. L.; Boden, M.; Buske, F. A.; Frith, M.; Grant, C. E.; Clementi, L.; Ren, J.; Li, W. W.; Noble, W. S. MEME Suite: Tools for Motif Discovery and Searching. *Nucleic Acids Res* **2009**, *37* (Web Server issue), W202–W208. <https://doi.org/10.1093/nar/gkp335>.
- (16) Camacho, C.; Coulouris, G.; Avagyan, V.; Ma, N.; Papadopoulos, J.; Bealer, K.; Madden, T. L. BLAST+: Architecture and Applications. *BMC Bioinformatics* **2009**, *10* (1), 421–421. <https://doi.org/10.1186/1471-2105-10-421>.
- (17) Pradenas, G. A.; Myers, J. N.; Torres, A. G. Characterization of the Burkholderia Cenocepacia TonB Mutant as a Potential Live Attenuated Vaccine. *Vaccines* **2017**, *5* (4), 33. <https://doi.org/10.3390/vaccines5040033>.
- (18) Mott, T. M.; Vijayakumar, S.; Sbrana, E.; Endsley, J. J.; Torres, A. G. Characterization of the Burkholderia Mallei tonB Mutant and Its Potential as a Backbone Strain for Vaccine Development. *Plos Neglect Trop D* **2015**, *9* (6), e0003863. <https://doi.org/10.1371/journal.pntd.0003863>.
